1 **Rudhira/BCAS3 couples microtubules and intermediate filaments to promote cell migration**  
2 **for angiogenic remodeling.**

3  
4  
5 Divyesh Joshi<sup>1</sup> and Maneesha S. Inamdar<sup>1,2,\*</sup>

6  
7 <sup>1</sup>Molecular Biology and Genetics Unit, Jawaharlal Nehru Centre for Advanced Scientific Research,  
8 Bangalore-560064, India; <sup>2</sup>Institute for Stem Cell Biology and Regenerative Medicine, Bangalore, India.

9  
10  
11 **\*Author for correspondence:**

12 **Maneesha S. Inamdar**

13 ORCID: 0000-0002-8243-2821

14 Email address: [inamdar@jncasr.ac.in](mailto:inamdar@jncasr.ac.in)

15 Telephone number: +91-80-22082818

16  
17  
18  
19  
20  
21  
22  
23  
24  
25  
26  
27  
28  
29  
30  
31 **Running Title**

32 Rudhira controls cytoskeleton crosstalk

33  
34 **Keywords:** BCAS3; Rudhira; microtubules; vimentin; cytoskeleton crosstalk; intermediate filaments;  
35 focal adhesions; sprouting angiogenesis; angiogenic remodeling

39 **Abbreviations:**

- 40 Rudh: Rudhira  
41 BCAS3: Breast Carcinoma Amplified Sequence 3  
42 MT: Microtubule  
43 IF: Intermediate Filament  
44 Tub: Tubulin  
45 Vim: Vimentin  
46 FA: Focal Adhesion  
47 GFP: Green Fluorescent Protein  
48 EB1: End Binding Protein 1  
49 Minute: min  
50 Hour: h  
51 Second: s

52 **Abstract**

53 Blood vessel formation requires endothelial cell (EC) migration that depends on dynamic remodeling of  
54 the cytoskeleton. Rudhira/Breast Carcinoma Amplified Sequence 3 (BCAS3) is a cytoskeletal protein  
55 essential for EC migration and sprouting angiogenesis during mouse development and implicated in  
56 metastatic disease. Here, we report that Rudhira mediates cytoskeleton organization and dynamics  
57 during EC migration. Rudhira binds to both microtubules and Vimentin intermediate filaments (IFs) and  
58 stabilizes microtubules. Rudhira depletion impairs cytoskeletal crosstalk, microtubule stability and hence  
59 focal adhesion disassembly. The BCAS3 domain of Rudhira is necessary and sufficient for microtubule-IF  
60 crosslinking and cell migration. Pharmacologically restoring microtubule stability rescues gross  
61 cytoskeleton organization and angiogenic sprouting in Rudhira depleted cells. Our study identifies the  
62 novel and essential role of Rudhira in cytoskeletal crosstalk and assigns function to the conserved BCAS3  
63 domain. Targeting Rudhira could allow tissue-restricted cytoskeleton modulation to control cell  
64 migration and angiogenesis in development and disease.

65

## 66 **Introduction**

67 Cell migration in physiological or pathological contexts depends on co-ordinated changes in the  
68 cytoskeleton and cell-matrix adhesions. Directed endothelial cell (EC) migration is an important pre-  
69 requisite for developmental as well as pathological angiogenesis. ECs respond to molecular or  
70 mechanical cues in the dynamically changing microenvironment as they move to target tissues for  
71 sprouting and angiogenic remodeling. While the fundamental cytoskeletal machinery operates in ECs,  
72 few EC-specific cytoskeletal modulators are known. Perturbing the cytoskeleton results in dramatic loss  
73 of EC function. For example, non-centrosomal microtubules (MTs) and Vimentin IFs have recently been  
74 shown to have an indispensable role in sprouting angiogenesis [1, 2]. Further, disruption of either plus  
75 or minus ends of MTs, can inhibit MT-actin crosstalk, adhesion dynamics and thereby EC sprouting [3].  
76 Regulation of cytoskeletal interactions is likely to be important in developmental as well as tumour  
77 angiogenesis.

78  
79 While MTs and IFs can interact directly, several molecules are known to bridge cytoskeletal components.  
80 Cytolinkers of the plakin family are well characterized and connect MTs, IFs, actin filaments and plasma  
81 membrane components. The importance of cytoskeletal crosstalk is evident from the early postnatal  
82 lethality of mice lacking the prototype cytolinker Plectin [4]. Many ubiquitously expressed molecules like  
83 the MT motor Kinesin and tumor suppressor APC are critical for MT-IF crosslinking in fibroblasts and  
84 migrating astrocytes respectively [5, 6]. Recent elegant studies show that while MTs are essential for  
85 Vimentin IF assembly, Vimentin IFs provide memory for MT cytoskeleton regrowth highlighting the  
86 significance of the crosstalk and the positive feedback interaction between these two cytoskeletal  
87 components [7, 8].

88

89

90 Cytoskeletal components play a critical role in establishing cell polarity, force generation and regulation  
91 of adhesion complex components during cell migration. Close and intricate interactions between actin  
92 filaments, microtubules (MTs), intermediate filaments (IFs) and cytoskeleton-associated proteins bring  
93 about dynamic reorganization of cell shape and focal adhesions (FAs), essential for directed cell  
94 migration. Association with Vimentin IFs stabilizes MTs against depolymerising stresses and shrinkage,  
95 likely owing to the ten-fold slower turnover rate of Vimentin IFs [7]. In addition, MTs have been  
96 proposed to grow along Vimentin IFs, although the bridging components in this process remain elusive  
97 [7]. The physiological significance of this interaction is also unclear, in part, owing to the full-term  
98 survival of *vimentin* knockout mouse and the likely redundancy in IF functions [9]. Several cytoskeleton-  
99 associated molecules like the MT plus-end tracking proteins (+TIPs) EB1 and CLIP170 and spectraplakin  
100 family member ACF7 cross-bridge MTs and actin and guide MT growth to FAs for FA turnover and  
101 persistent migration [10].

102

103 Depletion of individual cytoskeleton components, associated proteins or cytolinkers often disrupts  
104 overall cytoskeleton architecture and dynamics, perturbing cell migration and adhesion. Multiple and/or  
105 redundant roles of the molecules involved as well as context-dependent responses make it challenging  
106 to decipher global and tissue-specific mechanisms that regulate this process. Identifying additional  
107 molecular components could help unravel mechanisms to control or promote cell migration in desired  
108 contexts.

109

110 Rudhira/BCAS3 (Breast Carcinoma Amplified Sequence 3) is a cytoskeletal protein essential for mouse  
111 developmental angiogenesis and implicated in tumor metastasis [11-13]. Rudhira binds to MTs and  
112 intermediate filaments (IFs) and promotes directional cell migration [11]. In this study we examine the  
113 mechanism by which Rudhira controls cytoskeletal remodeling during cell migration. We show that

114 Rudhira directly associates with MTs and IFs for MT-IF crosstalk, MT stability and dynamics and thereby  
115 FA turnover and cell migration, through its conserved BCAS3 domain. Our study provides new insights  
116 into the mechanism of cytoskeletal crosslinking and reorganization during cell migration, which will help  
117 understand physiological and pathological angiogenesis.

118

## 119 **Results**

### 120 **Rudhira is required for gross cytoskeletal organization**

121 We reported earlier that Rudhira/BCAS3 interacts with microtubules (MT) and intermediate filaments  
122 (IFs) and is required for actin reorganization for directional endothelial cell (EC) migration. Rudhira  
123 depletion deregulates several cellular and molecular processes critical for sprouting angiogenesis *in vitro*  
124 and *in vivo*, including cell adhesion and invasion [12]. To explore the possible mechanisms by which  
125 Rudhira functions in cell migration, we examined the effect of Rudhira depletion (knockdown, KD) on  
126 cytoskeletal organization as compared to the non-silencing control (NS) in mouse Saphenous Vein  
127 Endothelial Cell line (SVEC). Immunolocalization showed that unlike in control, in KD cells MTs were not  
128 aligned towards and appeared bent at the cell periphery while Vimentin IFs were fewer and not  
129 extended but present only in the perinuclear region (Figure 1A). KD cells also had thick actin bundles at  
130 the cell cortex (Figure 1B) in addition to increased stress fibres, suggesting aberrant cell-substratum  
131 adhesion [14]. However, protein levels of the cytoskeletal components were unaltered (Figure 1C).

132

### 133 **Rudhira directly interacts with and bridges IFs and MTs**

134 The intricate association of cytoskeletal components is dynamically regulated during cell migration. MTs  
135 and Vimentin IFs are coaligned in mesenchymal cells for efficient migration. While initially Vimentin IFs  
136 form along MTs, later these filaments provide a template for MT growth [7]. Further, IFs organize  
137 primarily by MT-dependent transport and actin-dependent flow, suggestive of extensive cytoskeletal  
138 crosstalk and cross-regulation during cell migration [8]. Rudhira interacts with Tubulin and Vimentin and  
139 localizes to MTs and IFs. To test the likely direct interaction of Rudhira with MTs and IFs *in vivo*, we used  
140 Proximity Ligation Assay (PLA), which detects interaction at single molecule resolution. Rudhira  
141 associated with both Tubulin and Vimentin, suggesting direct interactions of Rudhira with these  
142 cytoskeleton components within the cells (Figure 1D). In addition, triple immunofluorescence analysis

143 showed that Rudhira associates with MTs at sites often overlapping with Vimentin IFs suggesting that  
144 these interactions may be regulated by local factors or Tubulin or Vimentin properties (Figure 1E and  
145 line profile). These data indicate that Rudhira may simultaneously associate with MTs and IFs and IF  
146 association of Rudhira may favour its binding to MTs.

147

148 In agreement with its proposed role of bridging cytoskeletal components, we observed high overlap of  
149 Rudhira with the known cytolinker protein Plectin (Figure 1F). PLA between Rudhira and Plectin  
150 confirmed their interaction and suggested that they may have similar function *in vivo* (Figure 1F').  
151 Expectedly, MT-IF association *in vivo* was dramatically reduced in Rudhira depleted cells, as detected by  
152 double immunofluorescence (Figure 1G) and confirmed by PLA (Figure 1H). Thus, Rudhira is critical for  
153 MT-IF bridging in ECs.

154

### 155 **Rudhira governs the association and dynamics of microtubules and Vimentin intermediate filaments** 156 **in endothelial cells**

157 The crosstalk between IFs and MTs is essential for efficient EC migration [7, 15]. Hence, we tested for  
158 the association of IFs and MTs in live cells in low density cultures, where cells are in a migratory state.  
159 Live imaging of MTs using Silico-Rhodamine conjugated Docetaxel (SiR-Tubulin) showed that MTs grew  
160 radially towards the cell periphery and were stabilized there in control cells (NS), whereas KD had fewer  
161 MTs at the cell periphery and they often started to bend before reaching the periphery (red asterisk in  
162 Figure S1A and Video S1). To test MT-IF crosstalk we transiently expressed Vimentin-GFP and incubated  
163 cells with SiR-Tubulin. Like the endogenous Vimentin (Figure 1A, G), Vimentin-GFP filaments were less  
164 extended in KD cells, resulting in reduced alignment with MTs and perturbed dynamics (Figure 2A and  
165 Video S2). These data suggest that Rudhira is required for cytoskeletal crosstalk and organization for cell  
166 migration. Rudhira may also have a role in promoting the assembly of or stabilizing IFs.



167

168 The MT cytoskeleton is a highly dynamic macromolecular assembly, with a turnover rate of 5-15 min.  
169 MTs govern cell polarity and along with actin also control IF organization during migration. Controlled  
170 MT dynamics and stability contribute to cell migration by release of cell-ECM contacts and polarized  
171 asymmetric distribution of vesicles. Consistent with the earlier observation (Figure 1A), super-resolution  
172 microscopy of KD cells showed defective MT arrays with MTs often failing to reach the cell periphery as  
173 observed by depth-coding of MTs (Figure 2B). Further, MTs in KD cells seemed to cross over each other,  
174 indicating undirected growth, unlike in control cells which displayed aligned MTs near periphery. In  
175 addition, KD cells showed reduced co-staining for the +TIP, EB1, indicative of fewer growing MTs (Figure  
176 2B).

177

178 To test whether impaired migration of KD cells is due to defects in MT growth, we assessed EB1-GFP  
179 transfected control and KD cells by live imaging. Rudhira-depleted cells had fewer EB1-GFP positive MTs  
180 (Figure 2C and Video S3). +TIPs bind to and stabilize MTs at FAs for a time period of more than 15 s. The  
181 EB1 comets in KD cells appeared to be smaller in size and shorter-lived than those in control cells (Figure  
182 2B, C, D and Video S3). Time-projected (for 60 s) images (see Methods) also showed that MT growth in  
183 KD cells followed a criss-cross pattern towards the cell periphery, as compared to the straight linear  
184 growth of MTs in control, as judged by EB1-GFP movement in live cells (Figure 2C, D and Video S4).  
185 Unlike MTs in controls which grew radially towards and were stabilized at the periphery, MTs in KD cells  
186 were rarely stabilized and often started to bend before reaching the cell periphery. (Figure 2D and Video  
187 S3, S4). This suggests that MTs in KD cells encounter a physical constraint, likely thick actin stress fibres  
188 (Figure 1B), which may prevent their growth to the periphery, the site of cell-matrix adhesions.

189

190 **Rudhira associates with and stabilizes microtubules**

191 The differential association and dissociation of Microtubule-associated Proteins (MAPs) and cytoskeletal  
192 components modulates MT stability, essential for cell migration. Alpha-tubulin acetylation or  
193 deetyrosination (Glu) classically marks stable MTs [16]. Acetylation also provides mechanical resistance to  
194 breakage [17]. The cytoskeleton in KD cells was grossly disorganized, and our data indicated a role of  
195 Rudhira in MT and Vimentin IF crosstalk. Since Vimentin preferentially associates with stable MTs [18]  
196 and functions to stabilize MTs, we tested whether binding of Rudhira contributes to MT stability. Stable  
197 MTs are oriented towards the leading edge of a migrating cell and due to their higher affinity for MT  
198 motors *in vitro* are considered to maintain directional migration by polarized delivery of vesicles [19].  
199 Immunolocalization for acetylated (Ac) tubulin in a scratched EC monolayer 2 h after wounding, showed  
200 that compared to control, KD cells had fewer stable MTs that did not reach the leading edge (Figure 3A).  
201 Immunoblot also showed significant decrease in Ac- and Glu-  $\alpha$ -tubulin levels, indicating that Rudhira  
202 depletion destabilized MTs (Figure 3B). This was confirmed by treatment with MT-depolymerising drug  
203 and cold treatment. As compared to controls, MTs in Rudhira-depleted cells were more sensitive to both  
204 MT depolymerization stresses (Figure 3C, C'). 10  $\mu$ M Nocodazole caused complete MT depolymerization  
205 in both control and KD cells. However low concentrations of Nocodazole (4 nM to 400 nM) depolymerise  
206 dynamic but not stable MTs in a dose-dependent manner. KD cells were more sensitive to 10 nM  
207 Nocodazole and showed a dramatic reduction in MT number as compared to controls, which showed a  
208 well-organized MT-array with little apparent reduction in MT numbers (Figure 3C).

209  
210 Treatment of cells that overexpress Rudhira with MT-depolymerising doses of Nocodazole showed that  
211 their MTs are Nocodazole-resistant, as compared to control, where most MTs were depolymerised  
212 (Figure 3D, S1B). Further, Glu-tubulin levels were increased (Figure 3E) and the stable MTs were often  
213 associated with Rudhira as seen by immunolocalization (Figure S1C). Triple immunofluorescence analysis  
214 showed that Rudhira had a preferential association with deetyrosinated MTs (Figure 3F and line profile).

215 Thus, like Vimentin IFs, Rudhira binds to and stabilizes MTs and promotes MT-IF association likely  
216 leading to MT stability.

217

### 218 **Rudhira-depleted cells have large focal adhesions**

219 MT dynamics and stability have been well studied in the context of cell migration. Cells adhere to the  
220 ECM ligands via focal adhesions (FAs) assembled on the cell-peripheral ends of actin stress fibres. MT  
221 and F-actin recruitment is essential for FA organization and dynamics [20]. While FA assembly is actin-  
222 driven, disassembly requires their interaction with MTs and subsequent internalisation, resulting in  
223 contact dissociation from the ECM. Although Vimentin IFs have also been shown to directly associate  
224 with FA molecule Vinculin and control its localization, MT targeting of FAs is essential for FA disassembly  
225 and thereby cell migration. Gross disorganization of cytoskeleton had suggested defective adhesion of  
226 the KD cells to the ECM (Figure 1A, B). Expectedly, the bent and unaligned MTs in KD cells were unable  
227 to reach FAs as compared to the controls, which efficiently targeted FAs radially (Figure 4A).  
228 Immunolocalization of FA molecules Vinculin and Paxillin revealed a dramatic increase in size and  
229 reduction in number of FAs upon Rudhira depletion as compared to control, suggesting impaired FA  
230 dynamics (Figure 4B, S2A). This was confirmed by staining the cells with a phospho-tyrosine (pY)  
231 antibody as FA proteins are highly tyrosine-phosphorylated (Figure S2B). Further, immunoblotting  
232 showed that the levels of Vinculin and Paxillin were not significantly altered (Figure 4C). Conversely,  
233 Rudhira overexpression increases migration rate [11], and as expected, immunolocalization analysis  
234 showed a mild decrease in FA size in Rudhira overexpressing cells (Rudh2AGFP) as compared to the  
235 untransfected or vector controls (Figure S2C). Further, transient overexpression of Rudhira in KD cells  
236 rescued the FA size phenotype (Figure 4D). Therefore, we hypothesized that Rudhira depletion may  
237 increase FA assembly, or decrease disassembly or both. Double-immuno-localization showed that  
238 Rudhira does not co-localize with Paxillin or pY (Figure S2D, D'), suggesting that Rudhira controls

239 cytoskeletal organization and dynamics resulting in modulated downstream FA dynamics and cell  
240 migration.

241

### 242 **Rudhira depletion impairs MT-dependent FA disassembly**

243 Directional cell migration requires continuous coordinated removal and formation (turnover) of FAs at  
244 the leading edge and release of attachment at the rear. Defects in the process of FA assembly or  
245 disassembly are both detrimental to cell migration. We examined the steady state dynamics of FAs in  
246 control and KD cells transiently transfected with Paxillin-GFP using time lapse live imaging (Figure 4E, F  
247 and Video S5). Our observations and analysis of the time-lapse images by the FAAS (Focal Adhesion  
248 Analysis Server, see Methods) [21] showed that FA assembly was not affected upon Rudhira depletion,  
249 while disassembly was reduced to half of that in the control cells (Figure 4E and Video S5). Time-  
250 projection of the live images also showed highly dynamic FAs in control cells, while KD FAs appeared to  
251 be immobile (Figure 4F and Video S5).

252

253 To confirm these results, we used specialized molecular and cellular functional assays. Rudhira-depleted  
254 cells did not show significant difference in attachment but spread earlier than controls on fibronectin  
255 matrix, indicating that FA assembly is not impaired (Figure 4G). The early initial spreading of *rudhira*  
256 knockdown cells could be due to the persistence of FAs even after the 20 min in suspension, within  
257 which time FAs disassemble in control cells. Treatment with the MT depolymerising agent, Nocodazole  
258 inhibits FA disassembly as MTs are not recruited to FA [22]. Upon Nocodazole treatment, while control  
259 cells showed FA disassembly after 30 min of Nocodazole washout, Rudhira KD ECs continued to show  
260 large FAs that failed to turnover (Figure 4H and Figure S3A, B). Paxillin turnover is indicative of FA  
261 turnover. Upon Cycloheximide treatment, Paxillin levels dropped in control cells within 7 h (the half-life  
262 of Paxillin) but showed only minimal reduction in KD cells, suggesting impaired FA turnover (Figure S3C).

263 Taken together these data suggest that Rudhira functions in MT-mediated FA disassembly. It is unlikely  
264 however, that Rudhira is a FA relaxing molecule, since MTs are dispensable for gross localization of  
265 Rudhira [11].

266  
267 FA disassembly requires FA kinase (FAK) phosphorylation, subsequent MT-targeting of FAs and  
268 Dynamin2-mediated FA internalisation [22]. Immunolocalization and immunoblotting showed that  
269 Rudhira depletion does not alter levels of the components involved in FA-mediated signaling, namely  
270 FAK, pFAK and  $\beta$ 1 Integrin, Src and pSrc and the early events of FA disassembly (Figure 4I, S3D, E). These  
271 data validate that Rudhira has a primary function at the cytoskeleton, downstream to which it promotes  
272 FA turnover and cell migration.

273

#### 274 **Rudhira-dependent MT stability is essential for cytoskeletal organization**

275 We next asked whether cytoskeletal crosstalk regulating MT stability was the primary mode of action of  
276 Rudhira. The Rho GTPase RhoA acts through Rho-associated Kinase (ROCK) to disassemble MTs and IFs.  
277 Treatment with ROCK inhibitor can restore MT assembly and stability, IF extension as well as FA  
278 dynamics. Rudhira KD cells treated with ROCKi showed almost complete rescue of phenotypes as  
279 observed by recovery of MT organization and cell-peripheral alignment and reduced FA size (Figure 5A).  
280 Further, cortical actin bundles and stress fibres were dramatically reduced (Figure 5A'). MTs did not  
281 bend and could reach the cell periphery, possibly because they were not impeded by the thick cortical  
282 actin (Figure 5A inset, A'). These data suggest that the primary function of Rudhira is to provide  
283 physiological stability to MTs, and the loss of Rudhira can be compensated for by stabilizing MTs or  
284 inhibiting MT disassembly pharmacologically. However, MTs may also reorganize in response to ROCKi-  
285 induced cell shape changes, which cannot be ruled out. It is also possible that Rudhira depletion  
286 deregulates Rho GTPase effectors like mDia and Tau, to affect MT stability.

287

288 To dissect the effect of Rudhira depletion on MT stability from other properties leading to defective FA  
289 turnover, like cell shape changes, we transiently stabilized MTs in KD cells with Paclitaxel and scored for  
290 FA size. We observed a dose-dependent decrease in FA size with increasing concentration of Paclitaxel  
291 (Taxol, 10 nM to 100 nM) (Figure 5B). This suggests that drug-mediated MT stabilization can partially  
292 rescue the FA phenotype resulting from loss of Rudhira. However, at higher concentrations of Paclitaxel,  
293 FA size increased again, possibly due to drastic loss of MT dynamics, which could impede FA turnover.  
294 More interestingly, transient treatment with either ROCKi or Taxol led to the reorganization of Vimentin  
295 IFs and their co-association with MTs in KD cells (Figure 5C). Importantly, all concentrations of Taxol (10  
296 nM to 500 nM) resulted in the extension of Vimentin IFs and their association with MTs. These data  
297 indicate that pharmacologically stabilizing MTs while still maintaining their dynamics in Rudhira depleted  
298 cells is sufficient to restore normal cytoskeletal organization. These data suggest that the primary role of  
299 Rudhira is to stabilize MTs *in vivo*, likely by crosslinking MTs and IF components in endothelial cells.

300

### 301 **Rudhira regulates MT stability for angiogenic sprouting**

302 Rudhira functions in endothelial cell migration during angiogenesis. In mouse, loss of Rudhira causes  
303 mid-gestation lethality due to severe cardiovascular patterning defects and the loss of angiogenic  
304 sprouting [12]. As both MTs and Vimentin IFs have critical roles in endothelial sprouting [3], we  
305 hypothesized that the loss of sprouting in KD cells was due to a loss in MT-IF association and reduced  
306 physiological stability of MTs. Rho kinase inhibitor (ROCKi) and Taxol treatment are widely used to  
307 modulate sprouting angiogenesis [2, 23]. While Rho kinase (ROCK) inhibition promotes sprouting, low-  
308 dose Taxol (100 pM) is either inhibitory (in normoxia) or ineffective (hypoxia) in normal cells. Taxol  
309 treatment could stabilize MTs and promote MT-IF association at both high and low concentrations, like  
310 ROCKi treatment. However, for functional rescue we used low Taxol concentration as both the dynamics

311 and the stability of MTs are essential for sprouting. KD cells, which otherwise fail to sprout as reported  
312 earlier [12], when treated with either ROCKi or low-dose (100 pM) Taxol rescued sprouting angiogenesis  
313 (Figure 5D). This suggests that Rudhira is essential for MT stability, cytoskeletal crosslinking,  
314 organization and dynamics during developmental vascular remodeling.

315

316 **The C-terminal BCAS3 domain is necessary and sufficient for cytoskeletal organization and cell**  
317 **migration.**

318 To elucidate how the organization of Rudhira protein mediates its function, we undertook a deletion  
319 analysis. Rudhira is reported to have predicted WD40-like structural domains, involved in protein  
320 interactions, at the N-terminal region and an uncharacterized BCAS3 domain in the C-terminal region  
321 [24]. Using multiple bioinformatics domain analysis servers and based on high confidence score we  
322 mapped the limits of these domains (Figure S4A, also see Methods). Rudhira also encodes multiple  
323 isoforms, and a shorter isoform of unknown function that lacks the initial 229 residues is reported.  
324 Protein structure prediction tool Phyre2 predicted one  $\beta$ -propeller (maximum 99.8% confidence and  
325 17% identity) near the N-terminus (residues 92-434) (Figure S4B) and RaptorX predicted the presence of  
326 two  $\beta$ -propellers (residues 57-350, 351-582) (Figure S4B'). Interestingly, the C-terminal region did not  
327 align to any structure and is considered to be highly disordered (Figure S4B, B'). A PEST motif (signal for  
328 protein degradation, residues 883-903) was also identified in the C-terminal region (Figure 6A, S4A).

329

330 While the WD40 domains function in protein-protein interactions, the BCAS3 domain is reported in  
331 proteins expressed in breast cancer and implicated in the progression of breast cancer [25].  
332 Interestingly, a majority of the Rudhira post-translational modifications (PTMs) identified in high-  
333 throughput mass spectrometric screens were present in the C-terminal half of the protein (BCAS3+  
334 fragment), which houses the BCAS3 domain, typically 229-245 amino acids long (Figure S4C). Analysis

335 with MAPanalyzer (Microtubule-associated Protein Analyzer; <http://systbio.cau.edu.cn/mappred/>) [26]  
336 showed putative MT-interacting motifs in Rudhira distributed along the entire length of the protein  
337 (Figure S4D). Structural prediction using RaptorX suggested that while the N-terminal 1-460 fragment  
338 containing WD40 domains would form a 6-bladed  $\beta$ -propeller and  $\Delta$ BCAS3 ( $\Delta$ 522-805) would form two  
339  $\beta$ -propellers as in the full-length protein, the BCAS3+ fragment (461-928) would be mostly disordered  
340 (Figure S4E). Based on this information, we generated deletion mutants harbouring/lacking the putative  
341 domains or isoforms (Figure 6A) (see Methods) and expressed them in HEK293T cells.

342  
343 Some of the deletion mutants expressed poorly, suggesting that the fragments may be unstable.  
344 Treatment with the proteasomal inhibitor MG132 stabilized these fragments (Figure 6B). However, the  
345 WD40 domain containing fragment devoid of the BCAS3 domain ( $\Delta$ BCAS3), and the BCAS3 domain  
346 containing fragment (BCAS3+), both expressed at levels similar to those of the full-length protein (Full).  
347 Also, the WD40 and the BCAS3 domains were predicted at high confidence by multiple bioinformatics  
348 tools, as compared to other domains/motifs (Figure S4A). Hence further molecular and functional  
349 analysis was limited to these to avoid the possible differences due to varied expression levels.

350  
351 Interestingly, the full-length protein as well as the BCAS3+ fragment could efficiently co-  
352 immunoprecipitate tubulin. However, tubulin interaction was dramatically reduced with  $\Delta$ BCAS3 (Figure  
353 6C), suggesting that the BCAS3 domain of Rudhira and not the WD40 domain, is necessary and sufficient  
354 for Tubulin/MT-interaction. In addition, all the three fragments could co-immunoprecipitate Vimentin.  
355 This was confirmed by reverse co-immunoprecipitation with Tubulin and Vimentin, wherein Tubulin  
356 could efficiently pull-down the full-length protein but not  $\Delta$ BCAS3 mutant while Vimentin could pull-  
357 down the full-length as well as  $\Delta$ BCAS3, although the interaction with  $\Delta$ BCAS3 was slightly reduced as  
358 compared to the full-length (Figure 6C'). This suggested that while Rudhira contained multiple Vimentin-



359 binding regions, Tubulin-binding regions were present mainly in the BCAS3+ fragment. It is important to  
360 note that, in  $\Delta$ BCAS3, the region from 527 to 805 was deleted (instead of 521-792), because of the high  
361 sequence conservation in the BCAS3 domain till the 805 residue and to avoid the deletion of the  
362 overlapping SxIP motif (518-521). Also, the BCAS3+ fragment (461-928) had WD40 domains deleted but  
363 retained the BCAS3 domain and phosphorylation sites reported at high frequency.

364

365 To test whether the interactions with Tubulin and vimentin correlated with function, we overexpressed  
366 Rudhira full length or deletion mutants in KD cells and assayed for rescue of the KD phenotypes, namely  
367 reduced MT-Vimentin IF association, enlarged FAs and increased actin stress fibres. The full-length  
368 protein or BCAS3+ restored MT and Vimentin organization, MT-Vimentin IF association (Figure 6D), FA  
369 size and actin organization (Figure 6E, S4F, G, Video S6). However,  $\Delta$ BCAS3-expressing KD cells continued  
370 to show disorganized actin and MTs, reduced and less extended Vimentin IFs (Figure 6D), loss of IF-MT  
371 alignment and large FAs (Figure 6E, S4F, G, Video S6). To test the functional relevance of the BCAS3  
372 domain of Rudhira we checked the effect of its presence on cell migration in a trans-well assay.  
373 Overexpression of the full-length protein or the BCAS3+ in HEK293 cells resulted in an increase in  
374 migration, while  $\Delta$ BCAS3 did not (Figure 6F). Together, these data show that Rudhira-cytoskeleton  
375 interactions leading to MT-IF crosstalk mediated by the BCAS3 domain is essential for regulating  
376 cytoskeleton architecture. Further, the BCAS3 domain is necessary and sufficient for Rudhira function.

377

## 378 **Discussion**

379 In a dynamically regulated system such as the vasculature, controlled endothelial cell migration and  
380 sprouting angiogenesis are key to ensuring blood supply during development and tissue repair. Defects  
381 in this process can lead to developmental anomalies or even embryonic death. The cycle of endothelial  
382 cell proliferation, migration and sprouting angiogenesis is influenced by several physiological and

383 pathological cues. Cytoskeletal remodeling underlies all of these processes and mediates molecular  
384 crosstalk to ensure a calibrated response over a range of signals. Cell type-specific components ensure  
385 an appropriate response to the dynamic cues from circulation as well as the tissue microenvironment.  
386 Rudhira is a dynamically regulated molecule with tissue-specific roles in regulating the cytoskeleton in  
387 endothelial migration and sprouting angiogenesis [11, 12]. Here we investigated the molecular  
388 mechanism by which Rudhira regulates the cytoskeleton and found that Rudhira crosslinks IF and MT  
389 cytoskeleton, stabilizes MTs and directs MTs for FA disassembly, mediated by its BCAS3 domain.

390

391 Vimentin IFs template MT growth and stabilize MTs. The presence of Rudhira, MTs and Vimentin IFs  
392 together suggests a major role of Rudhira in cytoskeletal crosstalk. The primary function of Rudhira  
393 appears to be binding to MTs and Vimentin IFs, providing physiological stability to MTs and promoting  
394 Vimentin IF extension, to aid cytoskeletal organization and downstream processes. It is, however  
395 possible that the restoration of cytoskeletal architecture and sprouting observed upon treatment with  
396 ROCKi or Taxol was not through their effect on MTs but rather due to probable effects on other  
397 cytoskeletal components including Rudhira, Vimentin or actin. We reported earlier that *rudhira* KD cells  
398 have dramatically reduced soluble Vimentin [12]. ROCKi and Taxol are also known to solubilize Vimentin,  
399 which may also rescue the loss of Rudhira. It is also possible that ROCKi or Taxol treatment may stabilize  
400 MTs or prevent their disassembly and simultaneously lead to the formation of secondary sites for MT  
401 nucleation, which may lead to the rescue of Rudhira depletion phenotypes and sprouting. Cytoskeletal  
402 crosstalk is complex, and it is likely and probable that Rudhira functions with other cytolinkers and  
403 cytoskeleton-associated molecules for coupling MTs and IFs.

404

405 Rudhira is developmentally essential and transiently expressed in angiogenic endothelium during  
406 vascular development. It will be interesting test the possibility of transient expression of Rudhira or a

407 Rudhira-like molecule in other tissues which undergo dynamic remodeling. The cytolinker function of  
408 Rudhira sufficiently explains the molecular and cellular phenotypes observed upon its depletion.  
409 Identification and detailed characterization of the loss of function mutants of Rudhira or other  
410 cytolinkers may further our understanding and targeting of cytoskeletal crosstalk in vascular  
411 development and disease. Loss of Rudhira results in embryonic lethality in mouse with gross  
412 cardiovascular patterning defects. It is unlikely that stabilizing MTs would completely override the effect  
413 of loss of Rudhira. However, controlled restoration of MT stability and dynamics or the expression of  
414 another cytolinker in *rudhira* knockout may be useful in delineating the primary molecular function of  
415 Rudhira *in vivo*.

416

417 Aberrant cell-matrix adhesion is the underlying cause of defective migration in a variety of contexts [27].  
418 FA turnover is a complex process. Molecules that regulate FA components are known, however local  
419 interactions that direct MTs to FAs remain unclear. +TIP proteins such as CLASPs localize to FAs as well  
420 as MTs, thereby bridging the two for FA disassembly [28]. Rudhira, on the other hand, binds MTs and IFs  
421 but not FAs, highlighting its role as a targeted regulator of the cytoskeleton in this process. The effect of  
422 Rudhira depletion on FA disassembly and thereby cell migration hence appears to be downstream of its  
423 more direct role in aligning growing MTs towards the cell periphery and mediating their coalignment  
424 with IFs thereby stabilizing them. Hence the role of Rudhira is to organize the MT cytoskeleton  
425 downstream of FAK phosphorylation to bring about FA disassembly. In addition, the unaligned growth  
426 and fewer growing MTs in KD cells suggest a role for Rudhira before MTs encounter actin stress fibres at  
427 the cell periphery. Rudhira-mediated control of FA and MT dynamics are unlikely to be independent,  
428 owing to the strong correlation between the organization of the two as suggested in the literature as  
429 well as in our study [10].

430

431 MT-growth initiates primarily from the MT organizing centres (MTOCs). Loss of, or structural defects in  
432 the MTOCs, which are primarily centrosomes in endothelial cells, may also explain the defects in MT  
433 growth and stability. However, earlier studies suggest that although the MTOC does not realign along  
434 the direction of migration, it is indeed present in *rudhira* KD cells [11]. The contribution from the defects  
435 in polarity caused by Rudhira depletion may also lead to disorganized MT growth and architecture [11].  
436 Additionally, the involvement of independent molecular pathways controlling FA and MT organization  
437 cannot be ignored. Identification of further molecular interactors of Rudhira will delineate its position in  
438 the molecular pathway governing MT growth and recruitment to FAs. Bioinformatics analysis reveals the  
439 presence of SxIP motifs towards the C terminus of Rudhira, suggesting an interaction with EB proteins  
440 [29]. Thus, Rudhira may have a prominent role in MT growth towards FAs via EB proteins, known to be  
441 essential for MT growth and polarity. This also raises the interesting possibility that Rudhira may lay  
442 down tracks for MT growth.

443

444 The Rudhira protein has several conserved domains such as WD40 domains and the BCAS3 domain,  
445 however the relevance of its organization in the normal in vivo function of Rudhira is not known. WD40  
446 domain-containing proteins assume a beta propeller structure that is thought to act as a scaffold for  
447 multiple protein interactions. However, our experiments suggest that the C terminal fragment bearing  
448 the BCAS3 domain, rather than the N-terminal WD40 domain containing fragment, could bind tubulin  
449 and importantly, restore function. In addition to the BCAS3 domain, the BCAS3+ fragment includes a  
450 PEST domain, SxIP motifs, some of the C-terminal region and frequently reported phosphorylation sites,  
451 which may also contribute to the function. However, these additional features require the BCAS3  
452 domain, as removing the BCAS3 alone caused loss of BCAS3+ function. Some of the fragments, including  
453 the alternative isoform, the PEST motif deletion and others, showed increased susceptibility to  
454 ubiquitin-proteasome mediated degradation, suggesting complex regulation. It is possible that some of

455 these, like the alternative isoform, could be transiently and dynamically expressed for temporal control  
456 of Rudhira function, a possibility that merits further investigation. It is likely that this isoform has a  
457 physiologically relevant role, which enhances Rudhira function in specific contexts, as it contains the  
458 conserved BCAS3 domain but lacks the WD40 or other domains. This report also assigns molecular  
459 function to the conserved BCAS3 domain sequence. It will be interesting to test whether the BCAS3  
460 domains present in many autophagy-related proteins and proteins expressed in cancers share similar  
461 functions.

462

463 The cytoskeleton is involved in multiple processes. The restricted expression of Rudhira may permit  
464 context-dependent regulation of these processes. Rudhira/BCAS3 is implicated in metastatic carcinomas  
465 [13, 25], where MTs undergo differential association with MT-associated proteins and transition to  
466 dynamic instability and Vimentin IFs are upregulated. Hence, we speculate that Rudhira may also play a  
467 role in mitosis. During development, Rudhira may control MT stability and alignment and MT-IF  
468 association, thereby maintaining cell and tissue polarity as well as migration. Our studies will aid in  
469 revealing the dynamics of the interaction between MTs, IFs and Rudhira in various contexts where  
470 intricate association of cytoskeleton, FA remodeling and cell migration are essential.

471

472 Rudhira expression in endothelial cells and its effects on angiogenesis shows its key role in vascular  
473 development by the control of MT stability and cytoskeleton organization. The mis-expression of  
474 Rudhira/BCAS3 in grade III glioblastomas and other cancers and association with coronary artery disease  
475 make it a principal target in these diseases. Our finding, that the BCAS3 domain is required for  
476 promoting cytoskeleton crosstalk, and maintaining MT architecture and FA dynamics, will help devise  
477 strategies for controlled alteration of cytoskeletal architecture to correct aberrant cell migration, tissue  
478 malignancy or degeneration.

479

480

481

## 482 **Materials and methods**

483

### 484 **Cell culture**

485 Mouse Saphenous Vein Endothelial Cell line (SVEC) was obtained from Kaustabh Rau, National Centre  
486 for Biological Sciences, Bangalore and HEK293, HEK293T cells were from ATCC. Cells were cultured in  
487 DMEM (ThermoFisher Scientific, USA) supplemented with 10% FBS (Gibco, ThermoFisher Scientific,  
488 USA). Generation of knockdown lines is reported elsewhere [12]. Serum starvation was performed for  
489 48 h in DMEM.

490

### 491 **Immunostaining, antibodies and small molecule treatment**

492 Cells were fixed in 4% paraformaldehyde at room temperature for 15 min or 100% methanol at -20 °C  
493 for 10 min and processed for immunostaining using standard procedure. Primary antibodies used were  
494 against Rudhira [11], Vinculin,  $\alpha$ -Tubulin, Ac-Tubulin (Sigma Chemical Co., USA)  $\beta$ -Tubulin  
495 (Developmental Studies Hybridoma Bank (DSHB), Iowa; ThermoFisher Scientific, USA; Abcam, USA),  
496 Paxillin, FAK,  $\beta$ 1 Integrin (Merck, USA), Vimentin, Glu-Tubulin, EB1 (Abcam, USA), Plectin (Santa Cruz  
497 Biotechnology, USA), GFP (ThermoFisher Scientific, USA), pFAK, pY (Cell Signaling Technologies, USA).  
498 Secondary antibodies were coupled to Alexa-Fluor 488 or Alexa-Fluor 568 or Alexa-Fluor 633 (Molecular  
499 Probes, USA). Phalloidin was conjugated to Alexa-Fluor 633 (Molecular Probes, USA). Nocodazole,  
500 Cycloheximide, ROCK inhibitor (ROCKi, Y27632) and Taxol (Paclitaxel) were from Sigma Chemical Co.,  
501 USA. NS and KD cells were treated with 50  $\mu$ g/ml of Cycloheximide for a period of 0, 7 and 14 h.  
502 Thereafter, the cells were taken for immunoblot analysis (Figure S3C). Cells were treated with ROCKi or

503 Taxol for 1 h and processed for immunostaining with Paxillin, Tubulin or Vimentin antibodies or  
504 Phalloidin, as indicated (Figure 5A, B, C).

505

506

507 **Fluorescence microscopy, live cell imaging and analysis**

508 Confocal microscopes (LSM 510 Meta, LSM 880 with Airy Scan from Zeiss, FV3000 from Olympus),  
509 Spinning Disc Microscope (Perkin Elmer with Yokogawa camera attachment) or a motorized inverted  
510 microscope with fluorescence attachment (IX81, Olympus) were used for fluorescence microscopy and  
511 time lapse imaging. Line profile of fluorescence intensities (Figure 3B, 4F) was generated in ZEN Blue  
512 software from Zeiss. Super-resolution microscopy was performed by imaging in the Airy Scan image  
513 acquisition and processing mode of the LSM 880, Zeiss. For live cell imaging, a sample heater (37°C) and  
514 CO<sub>2</sub> incubation chamber (Tokai Hit) were used to control temperature and CO<sub>2</sub> levels during live cell  
515 imaging. All images in a set were adjusted equally for brightness and contrast using Adobe Photoshop  
516 CS2, where required. Rudhira NS or KD cells were transiently transfected with EB1-GFP and seeded on  
517 fibronectin-coated glass-bottom dishes. Live imaging for EB1-GFP was carried out 24 h post seeding for 3  
518 min at 4 s intervals to determine MT growth and alignment. EB1-GFP live images were time-projected in  
519 ImageJ (NIH) to represent MT growth. EB1-GFP tracks were generated manually and residence time was  
520 calculated manually using ImageJ (NIH) with the manual tracking plug-in. Rudhira NS or KD cells were  
521 transiently transfected with Paxillin-GFP and seeded on fibronectin-coated glass-bottom dishes. Live  
522 imaging for Paxillin-GFP was carried out 24 h post seeding for 2-3 h at 5 min intervals to determine FA  
523 assembly and disassembly rates under steady state. The images were processed for estimation of  
524 various parameters using Focal Adhesion Analysis Server (FAAS) [21]. Paxillin-GFP, EB1-GFP live images  
525 were time-projected in ImageJ (NIH) to represent FA and MT growth dynamics respectively. Rudhira NS  
526 or KD cells were transiently transfected with Vimentin-GFP and seeded on fibronectin-coated glass-

527 bottom dishes. Cells were incubated with 250 nM SiR-Tubulin for 2 hours before live imaging was carried  
528 out for 4 min at 10 s intervals to test coalignment of MTs and IFs.

529

530

### 531 ***In situ* Proximity Ligation Assay (PLA or Duolink assay)**

532 *In situ* PLA (Proximity Ligation Assay) reaction was performed on SVEC cell lines. The cells were cultured,  
533 fixed, permeabilised and stained with primary antibodies as indicated. Thereafter, the protocol for PLA  
534 as recommended by manufacturer (Duolink, USA) was followed. Post PLA, nuclei were counterstained  
535 with DAPI.

536

### 537 **Cell attachment and spreading assays**

538 The assays and quantitation were carried out as mentioned in [30] which has cited [31], with a few  
539 modifications. Briefly, 96-well plates were coated with fibronectin (10 µg/ml) for 60 min at room  
540 temperature and blocked with heat-denatured filter-sterilized BSA for 30 min at room temperature.  
541 Cells were put in suspension in warm medium at 37 °C, 5% CO<sub>2</sub> to disassemble already formed FA.  
542 Thereafter, 20000 (for attachment) or 10000 (for spreading) cells were seeded per well and allowed to  
543 attach or spread for the indicated times. Floating or loosely attached cells were removed by washing  
544 twice with PBS and then fixed with 4% paraformaldehyde. For spreading assay, the extent of spreading  
545 was quantified in ImageJ (NIH) from RFP (expressed from the NS or KD vector) images. For attachment  
546 assay, cells were stained with 0.1% crystal violet for 60 min at room temperature, washed three times  
547 with water and the dye was solubilised in 100 µl 10% acetic acid and the absorbance was measured at  
548 570 nm using a plate reader. The total number of cells attached at 3 h was set to 100% for both NS and  
549 KD lines.

550



551 **Nocodazole and cold treatment**

552 For MT stability experiments (Figure 3C, C', D, S4B), cells were treated with indicated dosages of  
553 Nocodazole or cold Phosphate buffered Saline (PBS) (4 °C) for 30 min, washed twice with cold PBS and  
554 fixed in ice-cold methanol at -20 °C. For MT recovery experiments (Figure 2H, S3A, B) cells were treated  
555 with Nocodazole (10 µM) for 30 min in complete medium at 37 °C, 5% CO<sub>2</sub>, washed twice with PBS and  
556 incubated with fresh culture medium for desired time intervals as indicated. Thereafter, cells were fixed  
557 and taken for immunostaining of Vinculin, F-actin (Phalloidin) and α-Tubulin, as indicated.

558

559 **SiR-Tubulin labelling of MTs**

560 Silico-Rhodamine conjugated Docetaxal (SiR-Tubulin) was as used in [32] and was a kind gift from Sarit  
561 Agasti, JNCASR. MT labelling was performed as indicated in [32]. Briefly, cells were incubated with 250  
562 nM of SiR-Tubulin for 2 h in complete medium at 37 °C, 5% CO<sub>2</sub>, washed twice with fresh culture  
563 medium and taken for live cell imaging.

564

565 **Co-immunoprecipitation and Western blot analysis**

566 50 µg lysate was used for Western blot analysis by standard protocols. Primary antibodies used were as  
567 indicated earlier. HRP-conjugated secondary antibodies against appropriate species were used and  
568 signal developed using Clarity Western ECL substrate (Biorad, USA). Western blot intensities were  
569 normalised to GAPDH and quantification was carried out using ImageJ (NIH). For co-  
570 immunoprecipitation assays, 500 µg lysate of HEK293T cells overexpressing Rudhira fragments was  
571 incubated overnight with 10 µl of FLAG M2 beads (Sigma Chemical Co., USA) or 10 µl of β-Tubulin  
572 antibody (DSHB, Iowa) or Vimentin antibody (Sigma Chemical Co., USA), captured on Protein G-  
573 sepharose beads (Sigma Chemical Co., USA), washed three times in lysis buffer and analyzed by

574 immunoblotting with anti- $\beta$ -tubulin (Abcam, USA), Vimentin (Sigma Chemical Co., USA; Abcam, USA) or  
575 FLAG (Sigma Chemical Co., USA) antibody.

576

### 577 **Spheroid sprouting and transwell migration assay**

578 The assays and quantitation were carried out as described previously [11] [12]. Briefly, for spheroid  
579 sprouting, 750 cells each of the KD line were taken for spheroid formation in a round-bottom non-  
580 adherent 96-well dish (Costar, USA), in 1% CMC (carboxy methyl cellulose) in 10% FBS in DMEM. The  
581 spheroids formed were transferred to collagen gels (Rat tail, Type I, ThermoFisher Scientific, USA) with a  
582 final concentration of 2.5 mg/ml, with or without ROCKi or Taxol. Gels were overlaid with 200  $\mu$ l of 10%  
583 FBS in DMEM and the sprouting was monitored for 3 days. For transwell migration, 24 h after  
584 transfection with desired plasmid vectors, cells were serum-starved for 12 h and 20000 cells were plated  
585 onto the upper chamber of the transwell filter inserts with 8  $\mu$ m pore size, 24-well format (Costar, USA).  
586 10% serum medium was added to the lower chamber to serve as a chemo-attractant. After 24 h, cells  
587 were fixed in 4% paraformaldehyde for 10 min at room temperature. Cells on the top of the filter were  
588 removed using a cotton swab. Cells that had migrated to the bottom were fixed and stained with 0.5%  
589 crystal violet for 10 min at room temperature. The dye was extracted in methanol and absorbance  
590 measured spectrophotometrically at 570 nm.

591

### 592 **Rudhira *in silico* analysis, deletion mutant cloning, plasmid constructs and transfection**

593 Domain/motif prediction analysis of mouse Rudhira protein sequence (Uniprot Id Q8CCN5.2) was  
594 performed using various bioinformatics tools, namely Superfamily (<http://supfam.org/SUPERFAMILY/>),  
595 Motif Scan ([https://myhits.isb-sib.ch/cgi-bin/motif\\_scan](https://myhits.isb-sib.ch/cgi-bin/motif_scan)), Pfam (<https://pfam.xfam.org/>), NCBI-CDD  
596 ([https://www.ncbi.nlm.nih.gov/Structure/cdd/wrpsb.cgi?INPUT\\_TYPE=precalc&SEQUENCE=33300978](https://www.ncbi.nlm.nih.gov/Structure/cdd/wrpsb.cgi?INPUT_TYPE=precalc&SEQUENCE=33300978)),  
597 Motif Finder (<http://www.genome.jp/tools/motif/>), Interpro (<https://www.ebi.ac.uk/interpro/>),

598 epestfind in the EMBOSS package of ExPASy (<https://www.expasy.org/tools/>). Post Translational  
599 Modifications (PTMs) in Rudhira were identified using PhosphoSitePlus  
600 (<https://www.phosphosite.org/homeAction.action>). Microtubule binding regions were predicted using  
601 MAPanalyser (<http://systbio.cau.edu.cn/mappred/>). Rudhira full length protein or deletion mutant  
602 structure prediction was performed using Phyre2  
603 (<http://www.sbg.bio.ic.ac.uk/phyre2/html/page.cgi?id=index>) and RaptorX  
604 (<http://raptorx.uchicago.edu/>).

605  
606 pCMV-Rudh-IRES2-EGFP, pCAG-Rudh-2A-GFP (Figure 2D, S2C), pCMV-RudhFL-FLAG were described  
607 earlier [11]. Rudhira ORF was sub-cloned from pCAG-Rudh-2A-GFP vector into pEGFP-N3 vector  
608 (Clontech, USA) using NheI-SacII sites to obtain pCAG-Rudhira-GFP (Figure 3D, S4A, B). For deletion  
609 mutant cloning, the regions to be cloned were PCR amplified from pCMV-RudhFL-FLAG vector and  
610 cloned in pCMV-Tag2B vector (Stratagene, USA) (Figure 5B, C). The desired fragments from pCMV-Tag2B  
611 vectors were digested using EcoRI-XhoI and sub-cloned into the compatible EcoRI-Sall sites of pIRES2-  
612 EGFP vector (Clontech), to obtain GFP fluorescent reporter plasmids (Figure 3E, 5D, E, F, S5F, G). EB1-  
613 GFP plasmid was a kind gift from Yuko Mimori-Kiyosue (Riken Kobe, Japan) and Paxillin-GFP was a kind  
614 gift from Rick Horwitz. HEK293 and HEK293T cells were transfected using Calcium Phosphate method  
615 and SVEC cells were transfected using Lipofectamine 2000 (ThermoFisher Scientific, USA).

616

### 617 **Quantification and Statistical analyses**

618 Statistical significance analyses were performed using One Way ANOVA in the Data Analysis package in  
619 Microsoft Excel.  $p < 0.05$  was considered significant.

620

### 621 **Acknowledgements**

622 We thank Yuko Mimori-Kiyosue, Riken Kobe, Japan for EB1-GFP plasmid, Rick Horwitz for Paxillin-GFP  
623 plasmid, Sandrine Etienne-Manneville, Institut Pasteur, Paris for Vimentin-GFP plasmid, Sarit Agasti and  
624 Ranjan Sasmal, JNCASR for SiR-Tubulin; Preeti Jindal, Abarna Sinha and Aksah Sam for Bioinformatics  
625 analyses and generating deletion mutants; JNCASR Imaging facility, NCBS Central Imaging and Flow  
626 Facility, and laboratory members for fruitful discussions. This work was funded by grants from the  
627 Department of Biotechnology, Government of India (Sanction no. BT/PR11246/BRB/10/644/2008 dated  
628 29.09.2009) the Wellcome Trust, UK (094879/B/10/Z) and intramural funds from JNCASR, India.  
629 Maneesha S. Inamdar conceived of the project and directed the work. Maneesha S. Inamdar, Divyesh  
630 Joshi designed and performed all experiments, wrote the manuscript. The authors declare that they  
631 have no conflict of interest. Student's t-test or One Way ANOVA was used for statistical significance. All  
632 relevant data are within the paper and its Supplementary Information files.

633

634 **Figure legends**

635 **Figure 1. Rudhira interacts with and controls crosstalk between microtubules and intermediate**  
636 **filaments.** (A, B) NS and KD cells were co-stained for cytoskeleton markers, Tubulin and Vimentin (A) or  
637 Phalloidin (B) to detect gross cytoskeleton organization. (C) Immunoblot to detect the levels of  
638 cytoskeletal proteins. (D) Direct interaction between Rudhira and Tubulin or Vimentin in wild type SVECs  
639 analysed by Proximity Ligation Assay (PLA). Single antibody stained cells were taken as negative controls.  
640 (E) Relative localization of Vimentin IFs, Rudhira and MTs was performed by triple immunostaining in  
641 wild type SVECs. Line profile shows the fluorescence intensity peaks for the three colours along the  
642 yellow arrow. (F, F') Relative association of Rudhira with the cytolinker Plectin by immunofluorescence  
643 (F) or PLA (F'). Single antibody stained cells were taken as negative controls for PLA. (G) NS or KD cells  
644 were analysed for coalignment of Vimentin and MTs by co-immunofluorescence. Boxed regions are  
645 magnified in the insets. (H) Vimentin and MT association by Proximity Ligation Assay (PLA). Graph shows  
646 the quantitation of PLA dots per cell indicating extent of interaction. Error bars indicate standard error  
647 of mean (SEM). Results shown are a representative of at least three independent experiments with at  
648 least three biological replicates taken into account. Statistical analysis was carried out using one-way  
649 ANOVA. Scale Bar: (A, B, E) 10  $\mu\text{m}$ , (D, F, F', G, H) 10  $\mu\text{m}$ . \* $p < 0.05$ , \*\* $p < 0.01$ , \*\*\* $p < 0.001$ .

650

651 **Figure 2. Rudhira is required for MT-Vimentin IF association and dynamics in migrating endothelial**  
652 **cells.** (A) Time-lapse images of SVEC NS and KD cells transiently transfected with Vimentin-GFP and  
653 stained with SiR-Tubulin, imaged at 10-s intervals. Arrows indicate persistence of coaligned Vimentin IFs  
654 and MTs towards the cell periphery while arrowheads indicate the absence of Vimentin IFs and bent  
655 MTs before reaching the cell periphery in live migrating cells. (B) Super-resolution imaging after  
656 immunostaining NS and KD cells for  $\beta$ -Tubulin and EB1 to detect cell peripheral MT architecture and  
657 growing MTs. Panel to the right shows depth coding to detect MTs at cell periphery, the sites near cell-

658 matrix contacts. The graphs show area of EB1 dots (2329 EB1 dots for NS and 514 EB1 dots for KD, over  
659 5 images each), number of EB1 dots per cell (5 images each) and percentage of cells with aligned MTs  
660 (40 cells for NS and 46 cells for KD). Boxed regions are magnified in the insets. (C) Time-lapse images of  
661 SVEC NS and KD cells transiently transfected with EB1-GFP and imaged at 3-s intervals. Arrows indicate  
662 persistence of aligned EB1 positive MT growing end in NS and not in KD while red asterisk indicates a MT  
663 end not stabilized at the cell periphery. 20 live cells each of NS and KD were imaged. (D) Overlay of EB1-  
664 GFP tracks and their time-projection (insets) in NS and KD. Time-lapse images of a total of 50 randomly  
665 selected EB1-GFP comets from 5 cells each were analyzed manually for calculating residence-time at the  
666 cell periphery shown in the graph. Error bars indicate standard error of mean (SEM). Results shown are a  
667 representative of at least three independent experiments with at least three biological replicates taken  
668 into account. Statistical analysis was carried out using one-way ANOVA. Scale Bar: (A, D) 10  $\mu\text{m}$ , (B) 5  
669  $\mu\text{m}$ , (C) 1  $\mu\text{m}$ . \* $p < 0.05$ , \*\* $p < 0.01$ , \*\*\* $p < 0.001$ .

670

671 **Figure 3. Rudhira is essential for microtubule stability.** (A) Localization for acetylated MTs was analyzed  
672 in NS and KD cells by immunostaining post a scratch-wound healing assay. Arrows point to acetylated  
673 MTs towards the leading edge and arrowheads to acetylated MTs distributed all over the cell. Dotted  
674 line represents the wound margin. (B) Acetylated-Tubulin, Glu-Tubulin levels were analysed by  
675 immunoblot. (C, C') NS and KD cells were treated with the indicated dosages of Nocodazole for 30 min  
676 (C) or cold PBS at 4 °C (C') and MTs were analyzed by immunostaining for  $\beta$ -Tubulin. Boxed regions in (c,  
677 c') are magnified in the insets. (D) SVEC cells were transiently transfected with GFP or Rudhira-GFP  
678 (inset), treated with Nocodazole and MTs were analyzed by immunostaining for Tubulin. (E) Immunoblot  
679 analysis for Glu-Tubulin levels post 48 h serum starvation in HEK293 cells overexpressing Rudhira. (F)  
680 Relative localization of detyrosinated MTs (Glu-Tubulin), Rudhira and total MTs (Tubulin) was performed  
681 by triple immunostaining in wild type SVECs. Line profile shows the fluorescence intensity peaks for the

682 three colours along the yellow arrow in the inset (magnified boxed region). Error bars indicate standard  
683 error of mean (SEM). Results shown are a representative of three independent experiments. Statistical  
684 analysis was carried out using one-way ANOVA. Scale Bar: (A, C, C') 20  $\mu\text{m}$ , (D, F) 10  $\mu\text{m}$ .

685

686 **Figure 4. MT-mediated FA disassembly is impaired upon Rudhira depletion.** (A) Immunostaining for  
687 Tubulin and Paxillin to detect the association of cell peripheral MTs with FA. Non-silencing control (NS)  
688 or *rudhira* knockdown (KD) endothelial cells (SVEC) were analyzed by immunostaining (B) or by  
689 immunoblot of cell lysates (C) to detect FAs marked by Vinculin, Paxillin and p-Tyrosine (pY) as indicated.  
690 Graphs show the quantitation of FA size, and the size and number distribution for FAs from 10, 8 and 6  
691 images for analysis of Vinculin, Paxillin and pY respectively. (D) KD cells were transiently transfected with  
692 Rudhira-2A-GFP (Rudh2AGFP) or EGFP vectors and analyzed for FA size by immunostaining for Paxillin.  
693 (E) Time-lapse images of NS and KD cells transiently transfected with Paxillin-GFP monitored for 2-3 h  
694 and shown at 5-min intervals. Red arrow indicates a FA getting disassembled. Red arrowhead indicates a  
695 FA persisting over time and not getting disassembled. Yellow asterisk indicates a FA getting assembled  
696 over time. Graphs show the quantitation of FA assembly and disassembly rates computed using Focal  
697 Adhesion Analysis Server (FAAS) (see Methods), represented as whisker plots combined with scatter  
698 plots to show the distribution of individual FA. 5-7 optical slices were taken at 5-min intervals for 2 to 3  
699 h. FAAS identified 225 and 240 FA in NS cells for assembly and disassembly respectively; and 57 and 58  
700 FA in KD cells for assembly and disassembly respectively. 8-10 live cells each for NS and KD were imaged  
701 and analyzed. (F) Time-projected images of NS and KD cells imaged live after transient transfection with  
702 Paxillin-GFP and projected over 2 h to show the dynamics of FAs. (G) Quantitation of attachment and  
703 spreading profiles of cells on fibronectin with time, as indicated. (H) Recovery after Nocodazole  
704 treatment and immunostaining of fixed cells to detect FAs (marked by Vinculin). Cells were co-stained  
705 with Phalloidin (also see Figure S2A, B) to detect F-actin and DAPI to mark nuclei (Blue). Boxed regions in

706 (A, B, D, H) are magnified in the insets. (I) Immunoblot of NS or KD cell lysates to detect the levels of FA  
707 signaling proteins Src, pSrc, FAK, pFAK and  $\beta$ 1 Integrin. Error bars indicate standard error of mean (SEM).  
708 Results shown are a representative of at least three independent experiments. Statistical analysis was  
709 carried out using one-way ANOVA. Scale Bar: (A, B, F) 10  $\mu$ m, (D, H) 20  $\mu$ m, (E) 1  $\mu$ m. \* $p$ <0.05, \*\* $p$ <0.01,  
710 \*\*\* $p$ <0.001.

711

712 **Figure 5. Rudhira stabilises microtubules for cytoskeletal organization and angiogenesis.** (A, A')  
713 Rudhira KD cells were kept untreated or treated with 10  $\mu$ M ROCKi and analyzed for FA size and MT  
714 organization by co-immunostaining for Paxillin and Tubulin (A) or actin using Phalloidin (A'). Graph  
715 shows the quantification of relative FA size in ROCKi treated or untreated KD cells. Boxed regions in (A)  
716 are magnified in the insets. (B) Rudhira KD cells were treated with different concentrations of Taxol  
717 (Paclitaxel) as indicated, and analyzed for FA size and MT stabilization by co-immunostaining for Paxillin  
718 and Tubulin. Note the increasing fluorescence intensity of Tubulin and bundling (stability) of MTs with  
719 the increase in Taxol concentration. Graph shows the quantification of relative FA size in KD cells treated  
720 with different Taxol concentrations, compared to the untreated. (C) KD cells were treated with ROCKi or  
721 a range of Taxol concentrations, as indicated and analysed for MT-IF association by co-immunostaining  
722 for Vimentin and Tubulin. Graph shows the percentage of cells with coaligned MTs and IFs in each  
723 condition. (D) Spheroids formed from Rudhira KD cells were taken for collagen-based spheroid sprouting  
724 assay, in the presence or absence of ROCKi or Taxol, as indicated. Graph shows the quantification of the  
725 number of primary sprouts formed on Day 3 upon each treatment. Error bars indicate standard error of  
726 mean (SEM). Results shown are a representative of at least three independent experiments. Statistical  
727 analysis was carried out using one-way ANOVA. Scale Bar: (A) 20  $\mu$ m, (A', B, C) 10  $\mu$ m, (D) 100  $\mu$ m.  
728 \* $p$ <0.05, \*\* $p$ <0.01, \*\*\* $p$ <0.001.

729



730

731 **Figure 6. BCAS3 domain of Rudhira is necessary and sufficient for cytoskeletal crosstalk, organization**

732 **and cell migration.** (A) Schematic showing the deletion mutants of different regions of Rudhira protein,

733 based on putative motifs/domains identified using bioinformatics analyses (see Methods). WD1, WD2:

734 WD40 domains (blue); BCAS3: BCAS3 domain (orange); PEST: PEST motif (purple). Dotted line indicates

735 region deleted in  $\Delta$ BCAS3. (B) Validation of the expression of FLAG-tagged Rudhira full-length or deletion

736 mutants overexpressed in HEK293T cells by immunoblot, with or without MG132, as indicated. (C, C')

737 FLAG-tagged Rudhira full-length BCAS3 or BCAS3+ or  $\Delta$ BCAS3 fragments were analysed for interaction

738 with  $\beta$ -Tubulin or Vimentin by co-immunoprecipitation with FLAG antibody, confirmed by reverse co-

739 immunoprecipitation with  $\beta$ -Tubulin or Vimentin antibody (C'). (D, E) Rudhira full-length or fragments

740 (cloned in pIRES2-EGFP vector) were transiently transfected in KD cell line to test for the rescue of MT,

741 Vimentin IF organization, MT-Vimentin IF association and FA organization by double immunostaining for

742 Tubulin and Vimentin (D), Tubulin and actin (see Supplementary Figure S4F) or FA marker Paxillin (E).

743 Boxed regions in (D, E) are magnified in the insets and show perinuclear and cell peripheral regions (D)

744 or only the peripheral regions (E). Graphs show the quantitation of percentage of cells showing

745 coaligned MTs and Vimentin IFs from 10 cells and Paxillin FA size from at least 13 cells. (F) Rudhira full-

746 length or fragments were overexpressed in HEK293 cells and tested for function using a transwell-

747 migration assay, quantified in the graph. Error bars indicate standard error of mean (SEM). Results

748 shown are a representative of at least three independent experiments. Statistical analysis was carried

749 out using one-way ANOVA. Scale Bar: (D, E) 10  $\mu$ m, (F) 100  $\mu$ m. \*p<0.05, \*\*p<0.01, \*\*\*p<0.001.

750

## 751 References

- 752 1. Dave, J.M. and K.J. Bayless, *Vimentin as an integral regulator of cell adhesion and endothelial*  
753 *sprouting*. *Microcirculation*, 2014. **21**(4): p. 333-344.
- 754 2. Martin, M., et al., *Control of endothelial cell polarity and sprouting angiogenesis by non-*  
755 *centrosomal microtubules*. *eLife*, 2018. **7**: p. e33864.
- 756 3. Bayless, K.J. and G.A. Johnson, *Role of the cytoskeleton in formation and maintenance of*  
757 *angiogenic sprouts*. *Journal of vascular research*, 2011. **48**(5): p. 369-385.
- 758 4. Andrä, K., et al., *Targeted inactivation of plectin reveals essential function in maintaining the*  
759 *integrity of skin, muscle, and heart cytoarchitecture*. *Genes & development*, 1997. **11**(23): p.  
760 3143-3156.
- 761 5. Gyoeva, F.K. and V.I. Gelfand, *Coalignment of vimentin intermediate filaments with microtubules*  
762 *depends on kinesin*. *Nature*, 1991. **353**(6343): p. 445-8.
- 763 6. Sakamoto, Y., B. Boeda, and S. Etienne-Manneville, *APC binds intermediate filaments and is*  
764 *required for their reorganization during cell migration*. *J Cell Biol*, 2013. **200**(3): p. 249-58.
- 765 7. Gan, Z., et al., *Vimentin intermediate filaments template microtubule networks to enhance*  
766 *persistence in cell polarity and directed migration*. *Cell systems*, 2016. **3**(3): p. 252-263. e8.
- 767 8. Leduc, C. and S. Etienne-Manneville, *Regulation of microtubule-associated motors drives*  
768 *intermediate filament network polarization*. *J Cell Biol*, 2017. **216**(6): p. 1689-1703.
- 769 9. Colucci-Guyon, E., et al., *Mice lacking vimentin develop and reproduce without an obvious*  
770 *phenotype*. *Cell*, 1994. **79**(4): p. 679-94.
- 771 10. Stehbens, S. and T. Wittmann, *Targeting and transport: how microtubules control focal adhesion*  
772 *dynamics*. *The Journal of cell biology*, 2012. **198**(4): p. 481-489.
- 773 11. Jain, M., et al., *Rudhira/BCAS3 is a cytoskeletal protein that controls Cdc42 activation and*  
774 *directional cell migration during angiogenesis*. *Experimental cell research*, 2012. **318**(6): p. 753-  
775 767.
- 776 12. Shetty, R., et al., *Rudhira/BCAS3 is essential for mouse development and cardiovascular*  
777 *patterning*. *Scientific reports*, 2018. **8**(1): p. 5632.
- 778 13. Siva, K., et al., *Human BCAS3 expression in embryonic stem cells and vascular precursors*  
779 *suggests a role in human embryogenesis and tumor angiogenesis*. *PloS one*, 2007. **2**(11): p.  
780 e1202.
- 781 14. Geiger, B., *Membrane-cytoskeleton interaction*. *Biochimica et Biophysica Acta (BBA)-Reviews on*  
782 *Biomembranes*, 1983. **737**(3-4): p. 305-341.
- 783 15. Nieuwenhuizen, R.P., et al., *Co-Orientation: Quantifying Simultaneous Co-Localization and*  
784 *Orientational Alignment of Filaments in Light Microscopy*. *PloS one*, 2015. **10**(7): p. e0131756.
- 785 16. Bulinski, J.C. and G.G. Gundersen, *Stabilization and post-translational modification of*  
786 *microtubules during cellular morphogenesis*. *Bioessays*, 1991. **13**(6): p. 285-293.
- 787 17. Xu, Z., et al., *Microtubules acquire resistance from mechanical breakage through intraluminal*  
788 *acetylation*. *Science*, 2017. **356**(6335): p. 328-332.
- 789 18. Gurland, G. and G.G. Gundersen, *Stable, detyrosinated microtubules function to localize vimentin*  
790 *intermediate filaments in fibroblasts*. *J Cell Biol*, 1995. **131**(5): p. 1275-90.
- 791 19. Witte, H. and F. Bradke, *The role of the cytoskeleton during neuronal polarization*. *Curr Opin*  
792 *Neurobiol*, 2008. **18**(5): p. 479-87.
- 793 20. Kodama, A., et al., *ACF7: an essential integrator of microtubule dynamics*. *Cell*, 2003. **115**(3): p.  
794 343-354.
- 795 21. Berginski, M.E. and S.M. Gomez, *The Focal Adhesion Analysis Server: a web tool for analyzing*  
796 *focal adhesion dynamics*. *F1000Research*, 2013. **2**.

- 797 22. Ezratty, E.J., M.A. Partridge, and G.G. Gundersen, *Microtubule-induced focal adhesion*  
798 *disassembly is mediated by dynamin and focal adhesion kinase*. *Nature cell biology*, 2005. **7**(6):  
799 p. 581-590.
- 800 23. Kroll, J., et al., *Inhibition of Rho-dependent kinases ROCK I/II activates VEGF-driven retinal*  
801 *neovascularization and sprouting angiogenesis*. *American Journal of Physiology-Heart and*  
802 *Circulatory Physiology*, 2009. **296**(3): p. H893-H899.
- 803 24. Siva, K. and M.S. Inamdar, *Rudhira is a cytoplasmic WD40 protein expressed in mouse embryonic*  
804 *stem cells and during embryonic erythropoiesis*. *Gene expression patterns*, 2006. **6**(2): p. 225-  
805 234.
- 806 25. Bärlund, M., et al., *Cloning of BCAS3 (17q23) and BCAS4 (20q13) genes that undergo*  
807 *amplification, overexpression, and fusion in breast cancer*. *Genes, Chromosomes and Cancer*,  
808 2002. **35**(4): p. 311-317.
- 809 26. Zhou, Y., et al., *MAPanalyzer: a novel online tool for analyzing microtubule-associated proteins*.  
810 *Database*, 2015. **2015**.
- 811 27. Palecek, S.P., et al., *Integrin-ligand binding properties govern cell migration speed through cell-*  
812 *substratum adhesiveness*. *Nature*, 1997. **385**(6616): p. 537-540.
- 813 28. Stehbens, S.J., et al., *CLASPs link focal adhesion-associated microtubule capture to localized*  
814 *exocytosis and adhesion site turnover*. *Nature cell biology*, 2014. **16**(6): p. 561.
- 815 29. Jiang, K., et al., *A Proteome-wide screen for mammalian SxIP motif-containing microtubule plus-*  
816 *end tracking proteins*. *Current Biology*, 2012. **22**(19): p. 1800-1807.
- 817 30. Uchil, P.D., et al., *TRIM15 is a focal adhesion protein that regulates focal adhesion disassembly*. *J*  
818 *Cell Sci*, 2014. **127**(18): p. 3928-3942.
- 819 31. Humphries, M.J., *Cell-Substrate Adhesion Assays*. *Current Protocols in Cell Biology*, 2001: p. 9.1.  
820 1-9.1. 11.
- 821 32. Lukinavičius, G., et al., *Fluorogenic probes for live-cell imaging of the cytoskeleton*. *Nature*  
822 *methods*, 2014. **11**(7): p. 731.

823

824

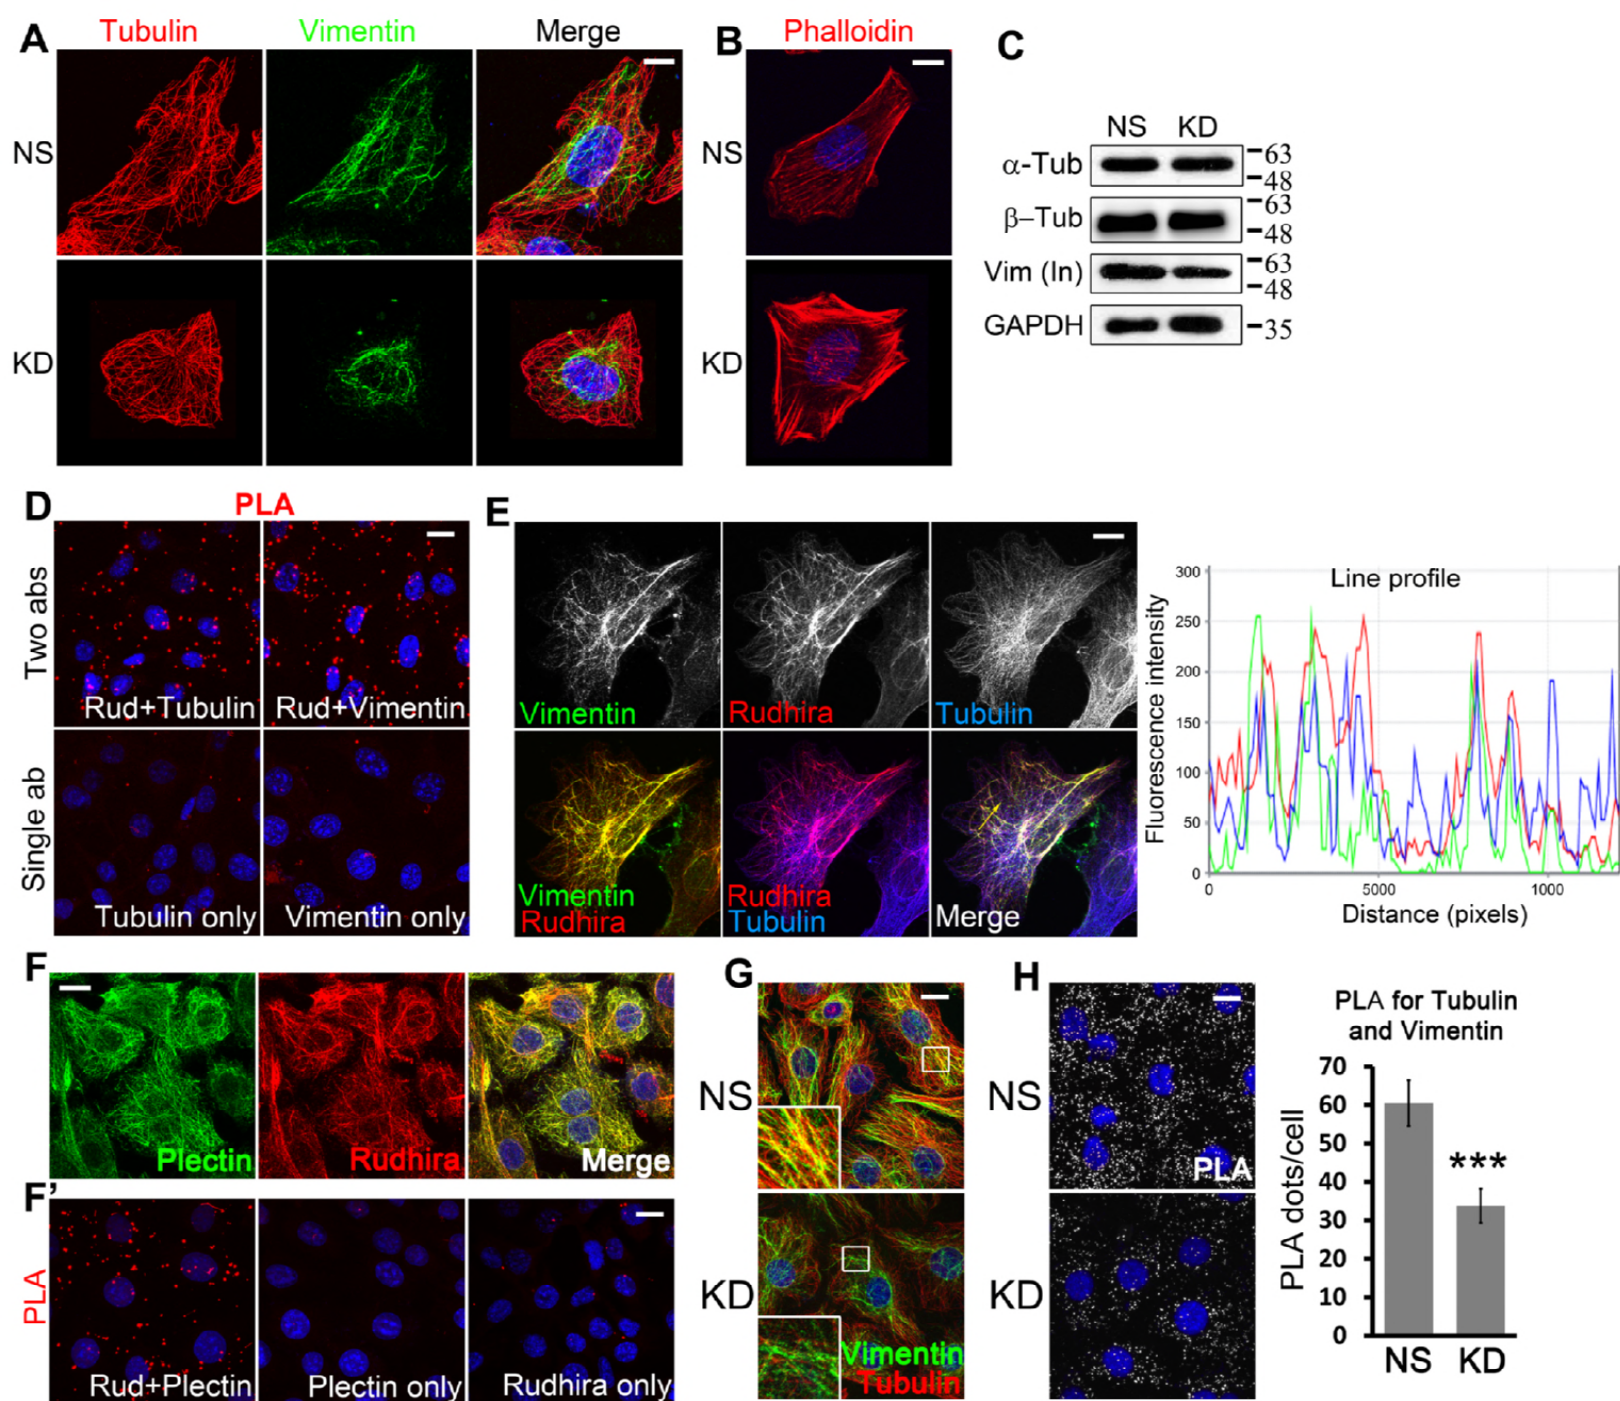

Figure 1



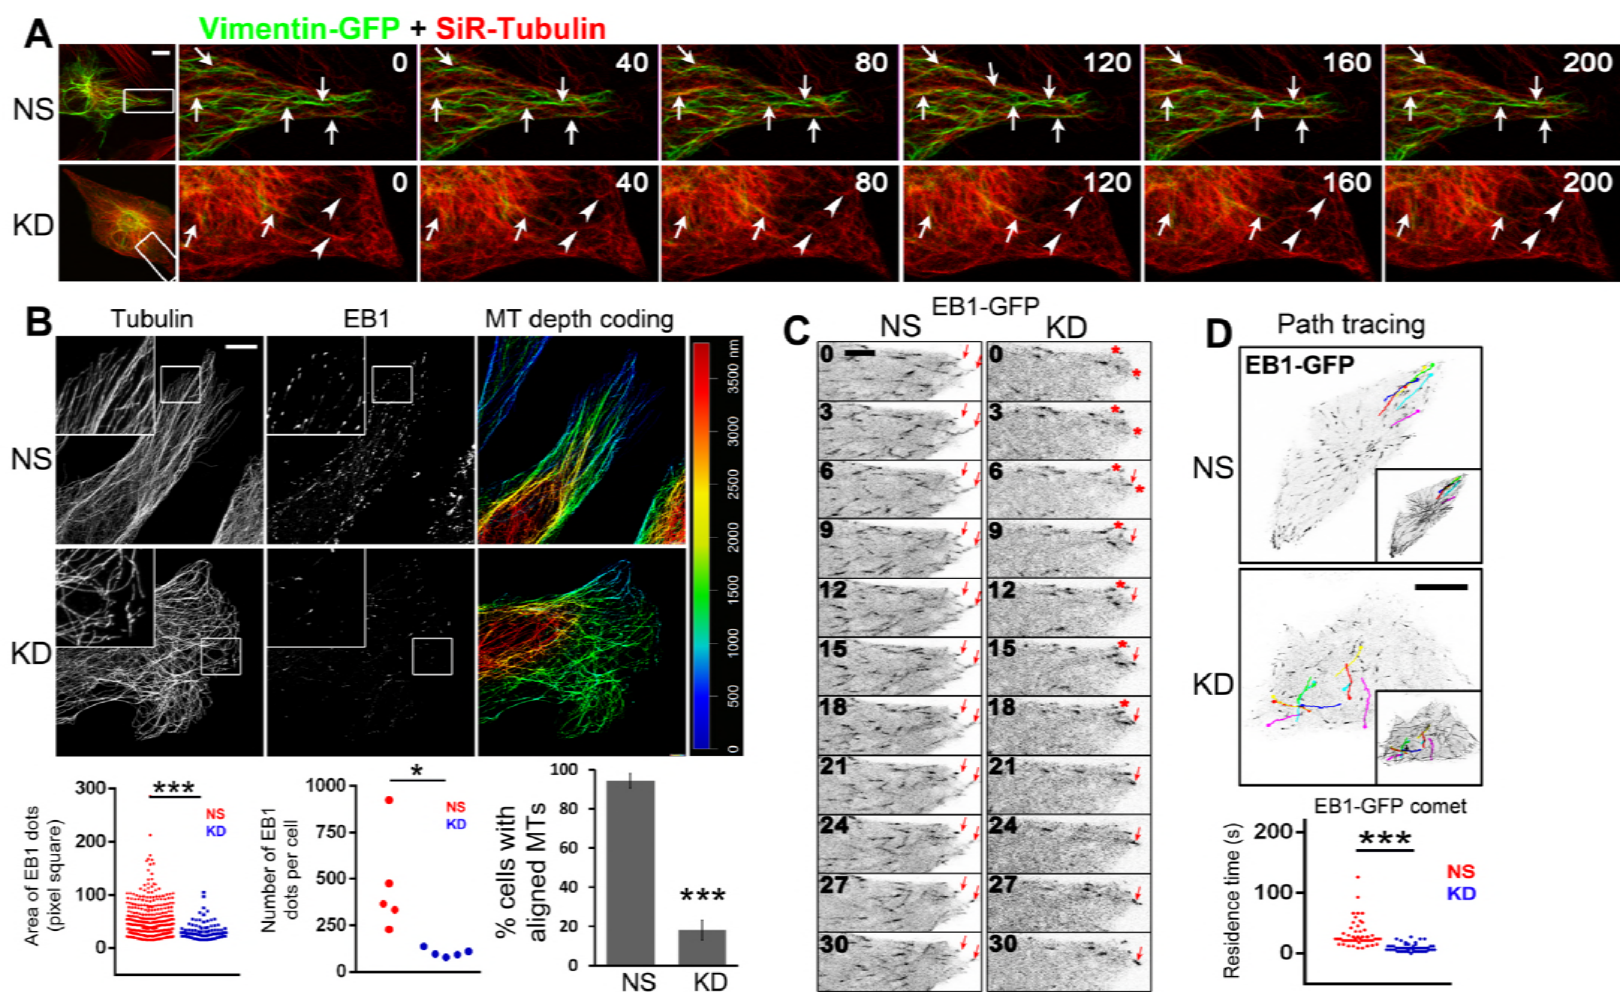

**Figure 2**

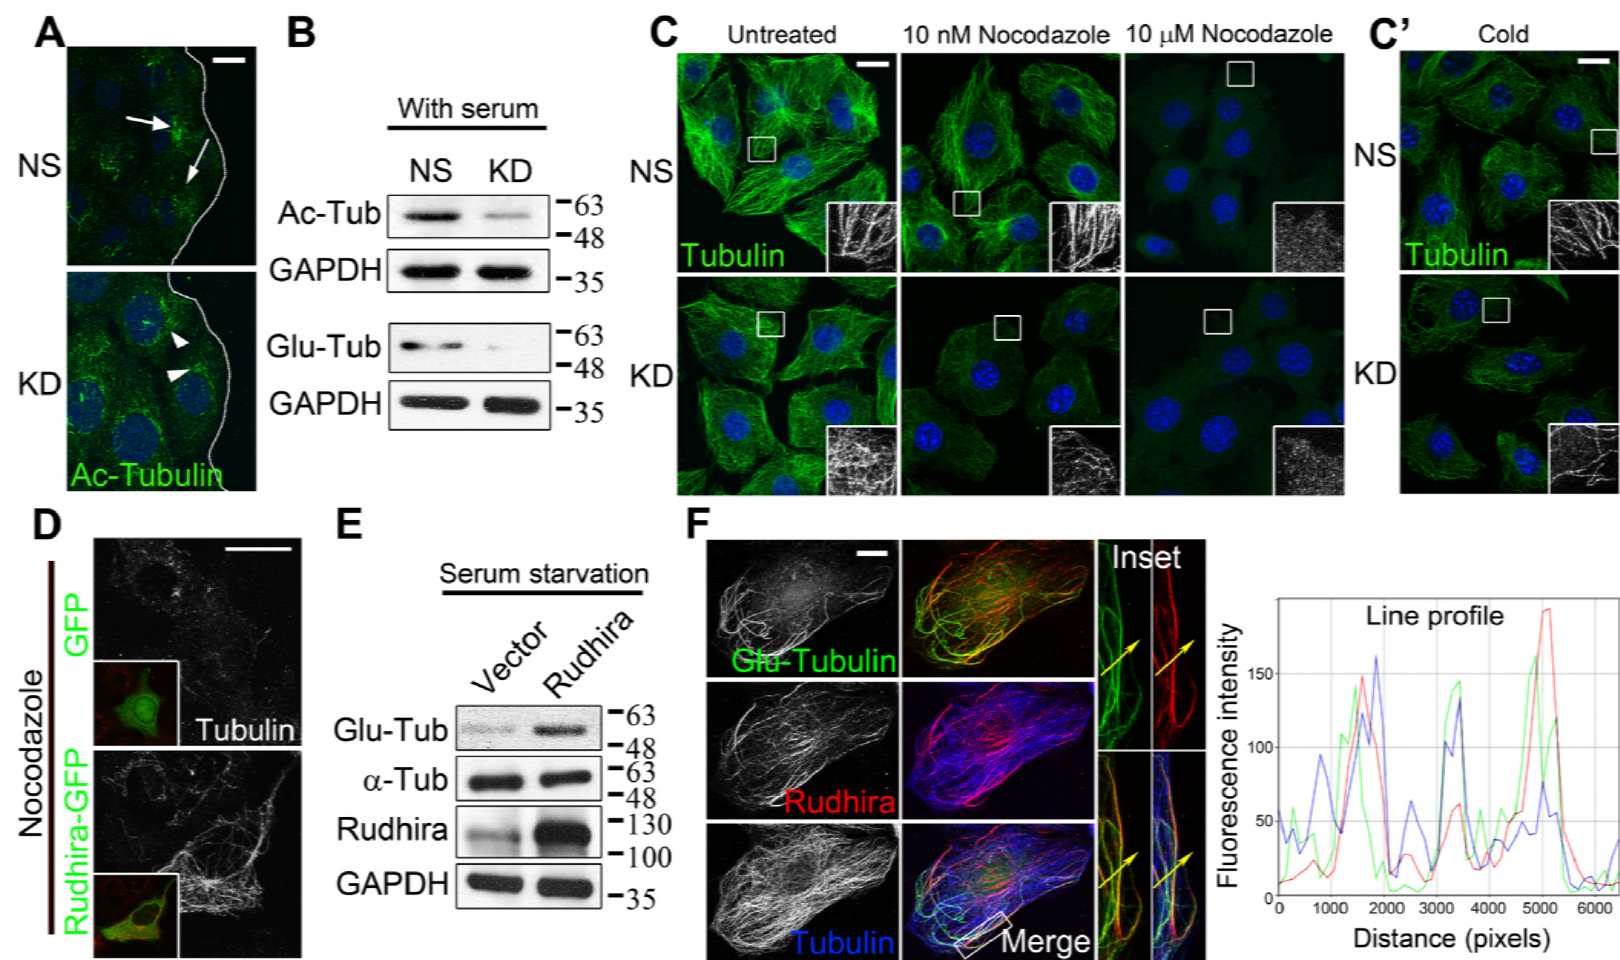

**Figure 3**



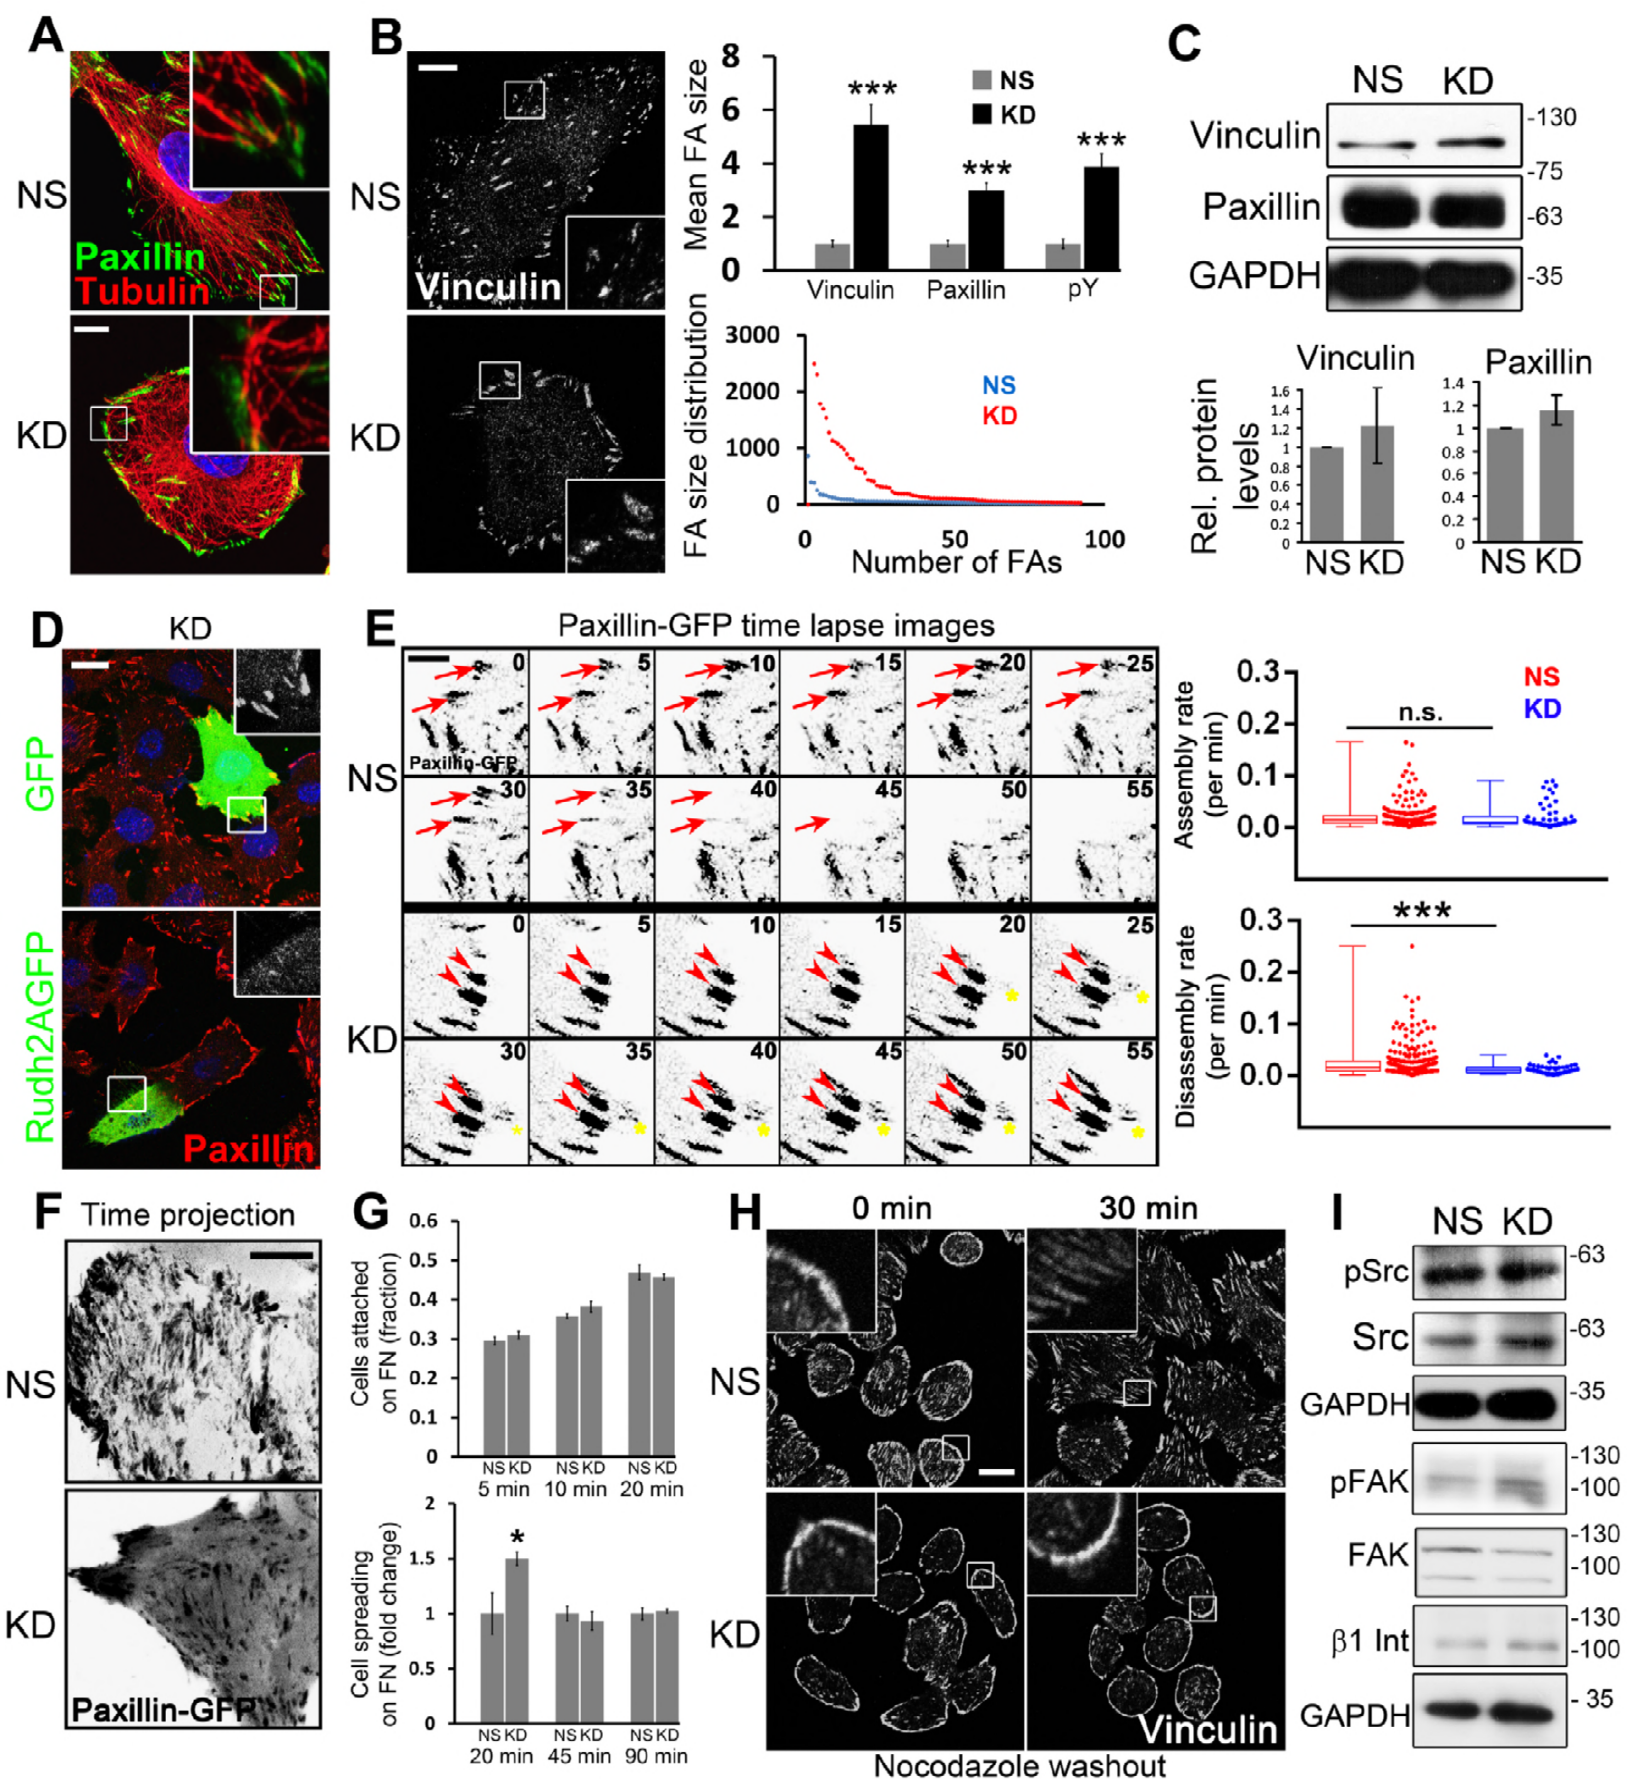

**Figure 4**

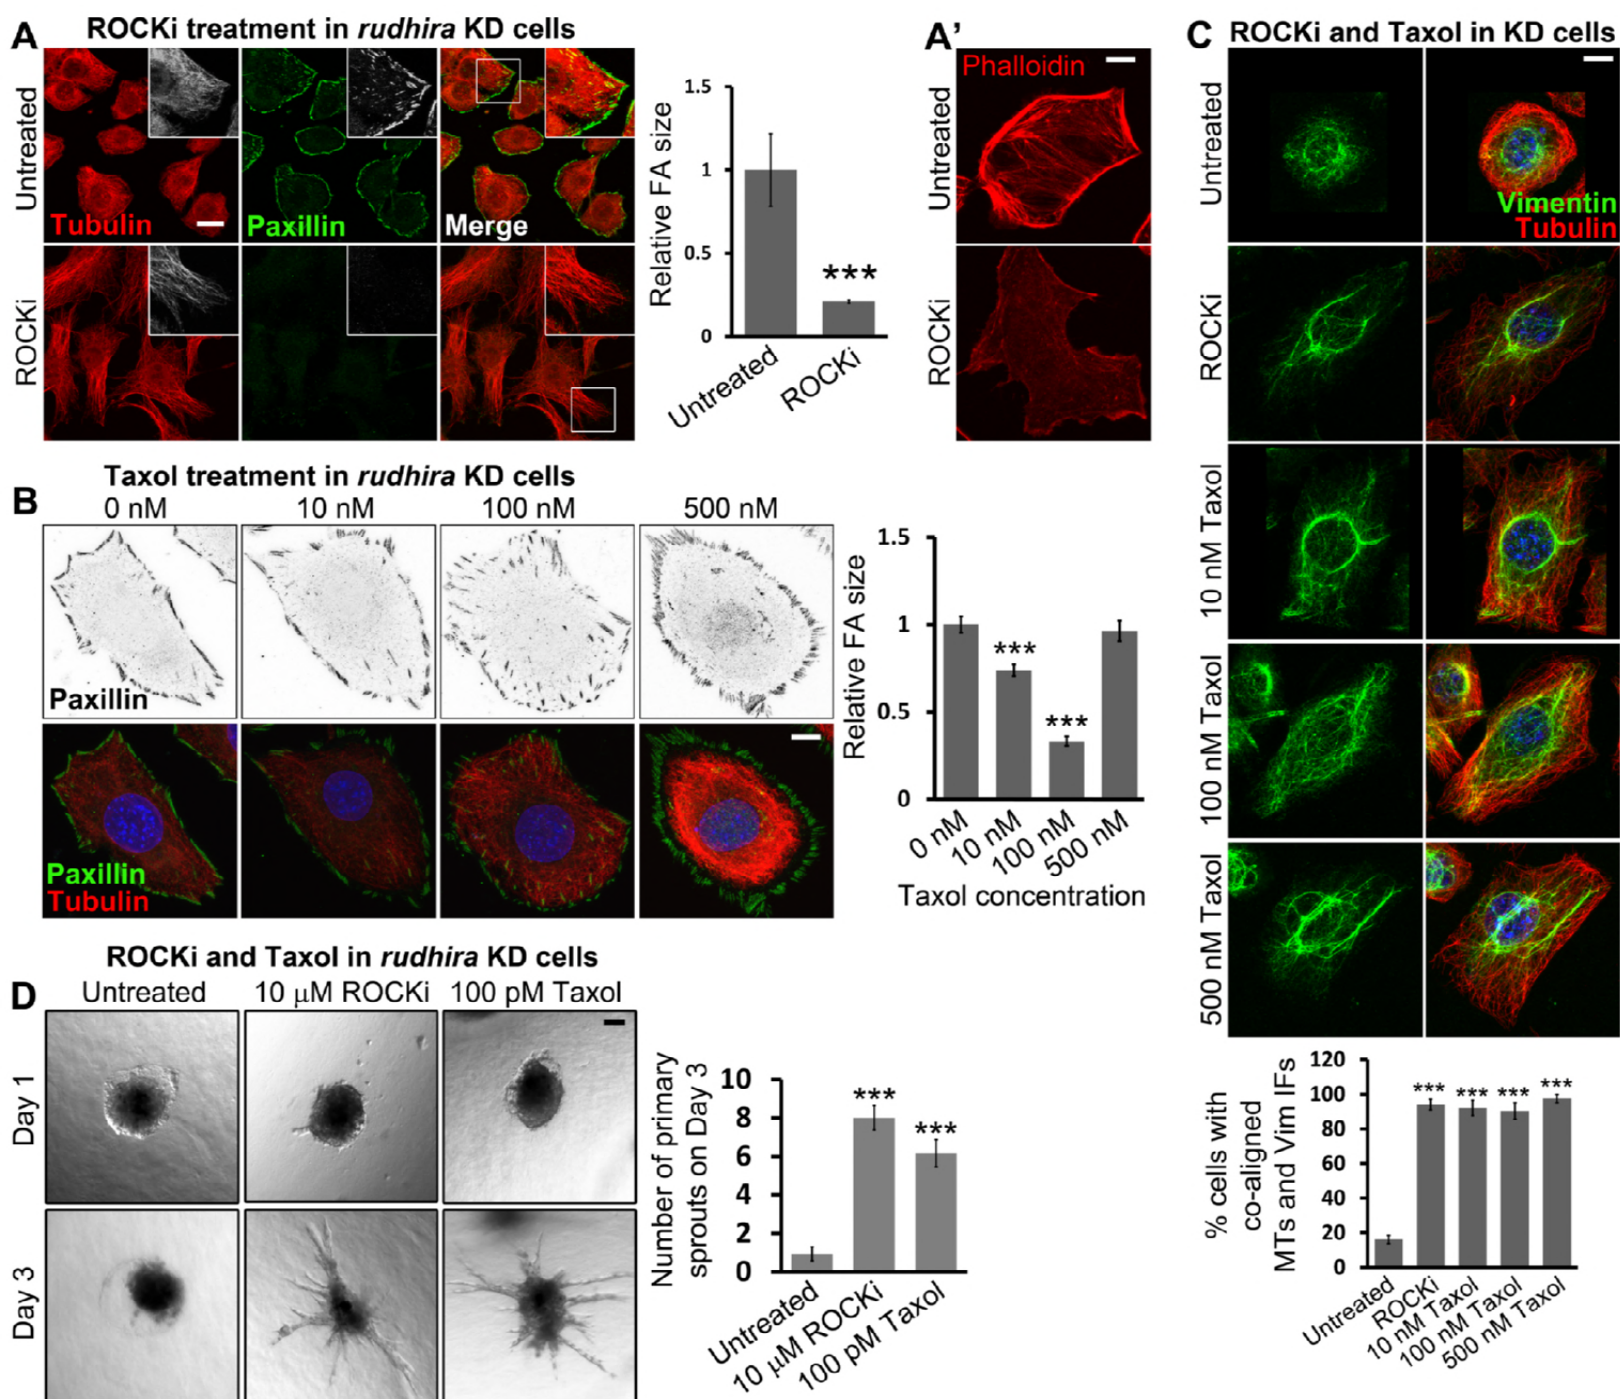

**Figure 5**



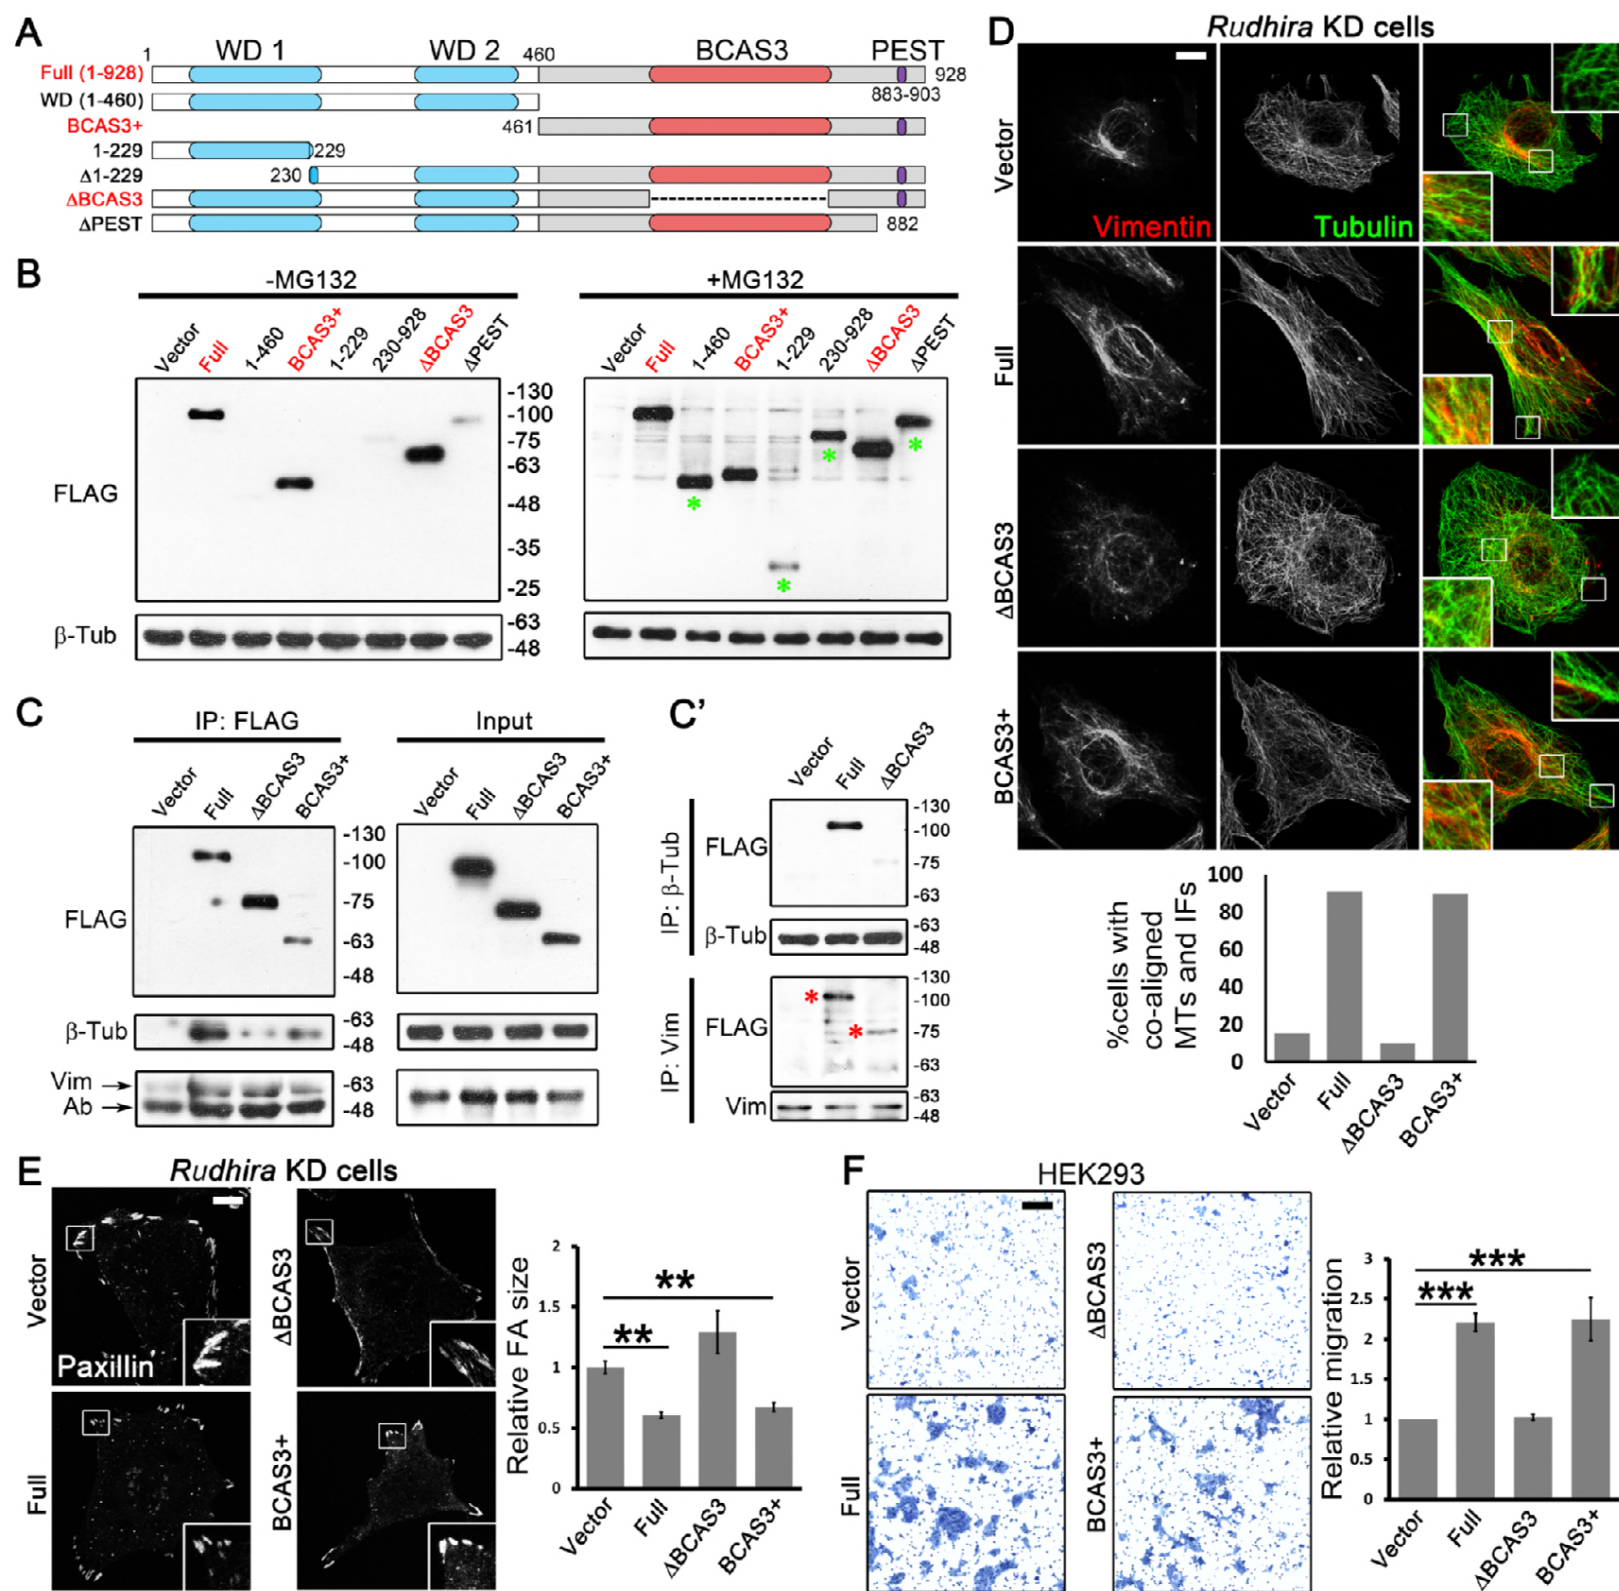

Figure 6
